# Supplementary material for: RAGE is a Critical Mediator of Pulmonary Oxidative Stress, Alveolar Macrophage Activation and Emphysema in Response to Cigarette Smoke
Source: PubMed Central journal article supplement (PMC6338799; doi:10.1038/s41598-018-36163-z), 2019-01-18
Supplement: 41598_2018_36163_MOESM1_ESM.pdf [file 41598_2018_36163_MOESM1_ESM.pdf]

## Supplementary Material

### **RAGE is a Critical Mediator of Pulmonary Oxidative Stress, Alveolar Macrophage Activation and Emphysema in Response to Cigarette Smoke**

Karl A. Sanders<sup>1,4</sup>, Don A. Delker<sup>2</sup>, Tom Huecksteadt<sup>4</sup>, Emily Beck<sup>1,4</sup>, Tanna Wuren<sup>4</sup>, Yuntian Chen<sup>5</sup>, Yuxia Zhang<sup>6</sup>, Mark W. Hazel<sup>2</sup> and John R. Hoidal<sup>1,3,4</sup>

<sup>1</sup>Division of Respiratory, Critical Care, and Occupational Pulmonary Medicine, University of Utah, Salt Lake City, Utah. <sup>2</sup>Division of Gastroenterology, Hepatology, and Nutrition, University of Utah, Salt Lake City, Utah. <sup>3</sup>Department of Internal Medicine, University of Utah, Salt Lake City, Utah. <sup>4</sup>George E. Wahlen Department of Veterans Affairs Medical Center, Salt Lake City, Utah. <sup>5</sup>Shanghai Ninth People's Hospital, Shanghai Jiao Tong University School of Medicine, Shanghai, China. <sup>6</sup>Department of Pharmacology, Toxicology and Therapeutics, University of Kansas Medical Center, Kansas City, Kansas.

Corresponding author J.R.H (email: [John.Hoidal@hsc.utah.edu](mailto:John.Hoidal@hsc.utah.edu))

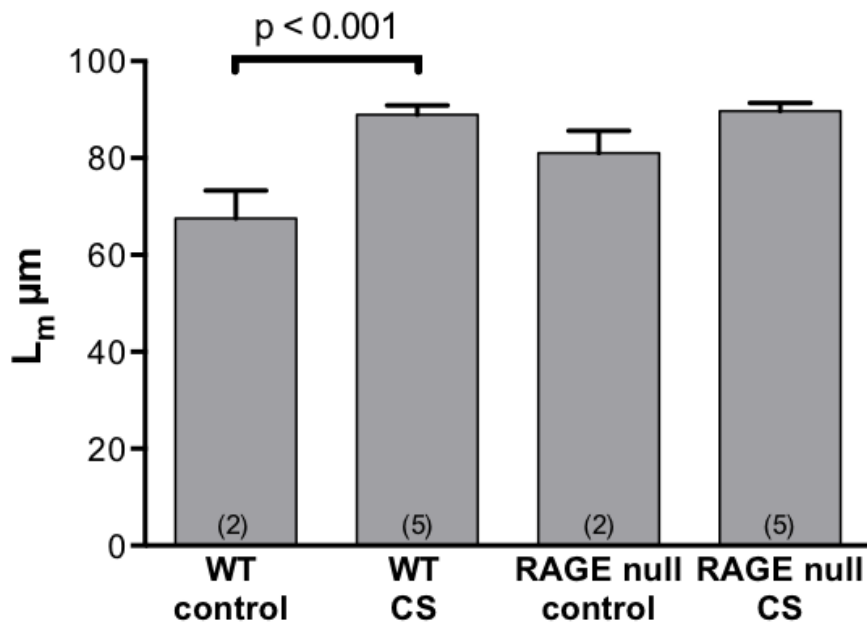

**Supplementary Figure 1. RAGE null mice are protected from tissue destruction following 4 months CS exposure.**  $L_m$  values demonstrate increased volume-to-surface ratios in RAGE null mice as compared with WT controls. Four months of CS exposure only increases  $L_m$  values in WT mice. Number of mice per group is indicated in parentheses. Statistical significance determined by one-way ANOVA.

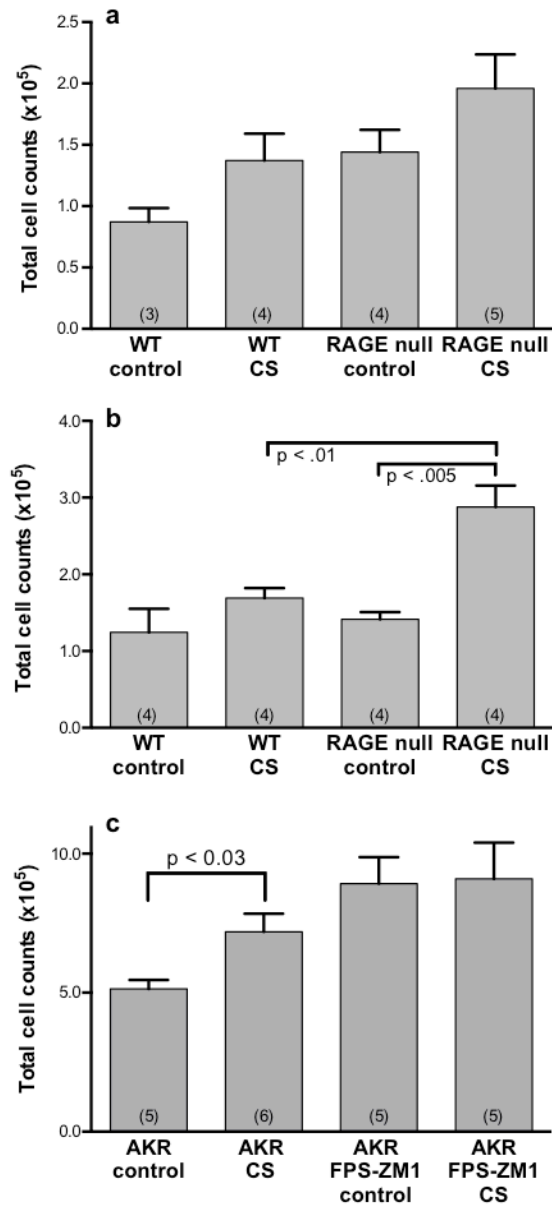

**Supplementary Figure 2. Absence or inhibition of RAGE does not reduce bronchoalveolar lavage cell counts following acute or chronic CS exposure. (a)** Neither WT nor RAGE null mice had a statistically significant increase in BAL cell counts after 7 days of CS exposure, although clear trends were present in both groups. **(b)** After 4 months of CS exposure, only smoked RAGE null mice had significantly increased numbers of cells in BAL. **(c)** After 2 months of CS exposure the AKR mice had significantly increased BAL cell counts as compared with controls. Administration of FPS-ZM1 to AKR mice significantly increased BAL cells counts as compared with untreated controls. However, there was no additional increase in BAL cell counts following two months of CS exposure in the FPS-ZM1 treated AKR mice as compared with FPS-ZM1 treated controls. Graphs show mean and standard error for each condition and/or genotype. Number of mice per group is indicated in parentheses. Statistical differences were determined by one-way ANOVA.

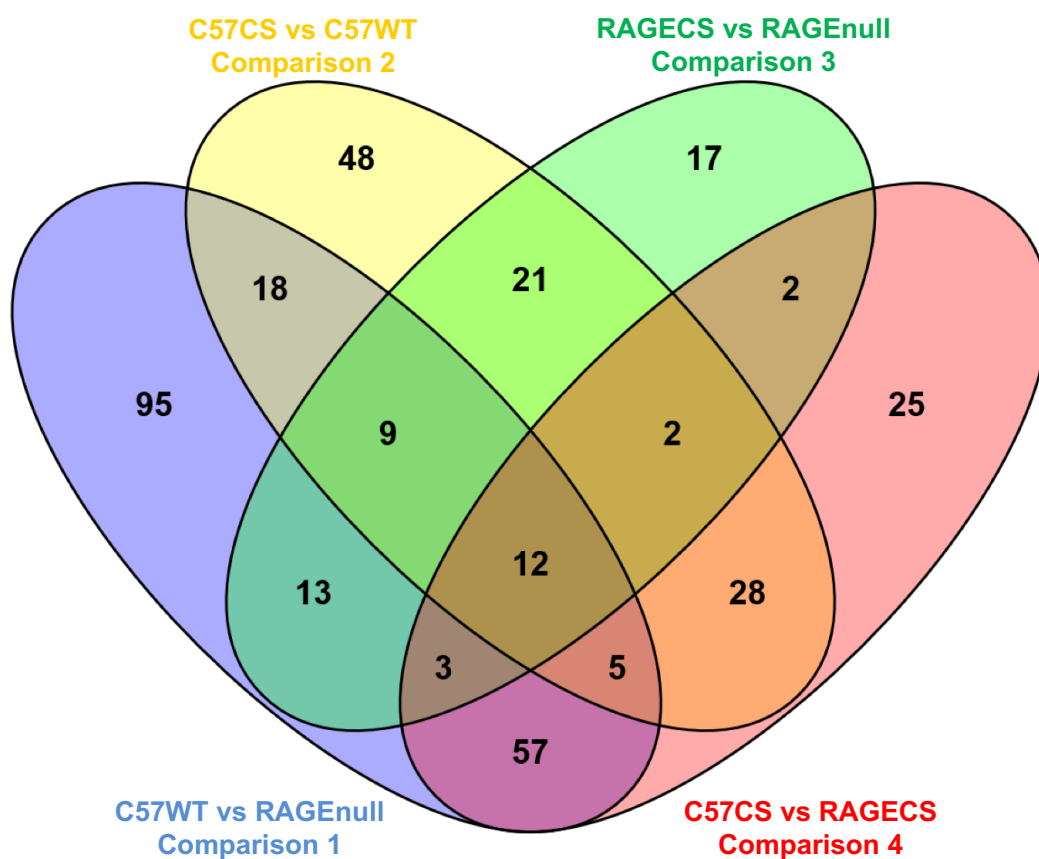

**Supplementary Figure 3. RNA sequencing demonstrates that CS exposure and RAGE mutation impact AM gene expression.** 212, 143, 79 and 134 genes were differentially expressed (Fold  $\geq$  1.5, FDR  $<$  0.05) for control WT mice compared to control RAGE null mice (Comparison 1), WT mice exposed to 7 days CS compared to control WT mice (Comparison 2), RAGE null mice exposed to 7 days CS compared to control RAGE null mice (Comparison 3) and WT mice exposed to 7 days CS compared to RAGE null mice exposed to 7 days CS (Comparison 4), respectively.

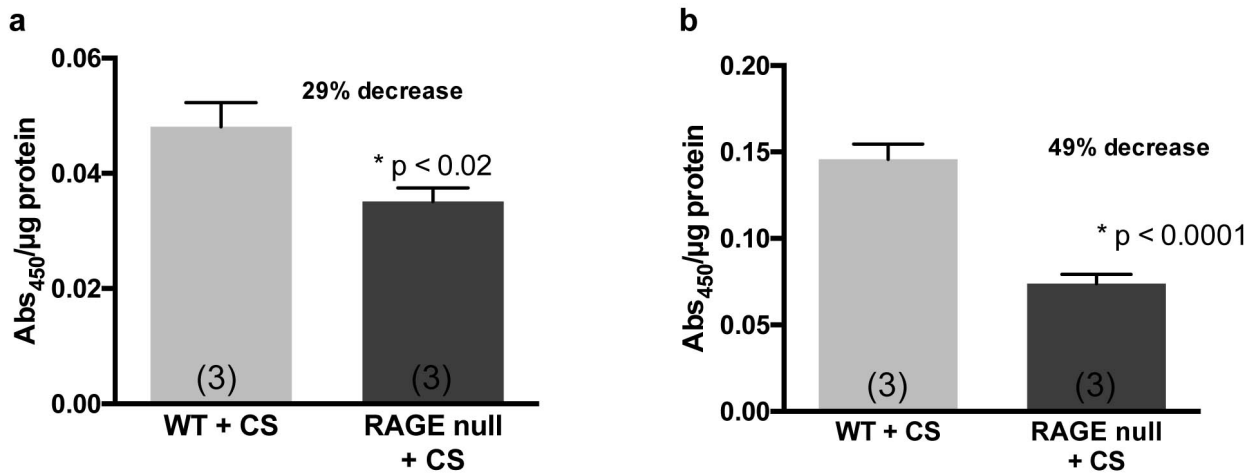

**Supplementary Figure 4. Nuclei from AM of RAGE null mice have less NF-κB and Nrf2 protein than WT mice following 7 days of CS exposure. (a)** The AM nuclei from RAGE null mice have 29% less NF-κB (p65) protein than WT mice after 7 days CS exposure ( $p < 0.02$ ). **(b)** The AM nuclei from RAGE null mice have 49% less Nrf2 protein than WT mice after 7 days CS exposure ( $p < 0.0001$ ). Number of mice per group is indicated in parentheses. Statistical differences were determined by Student's t-test.

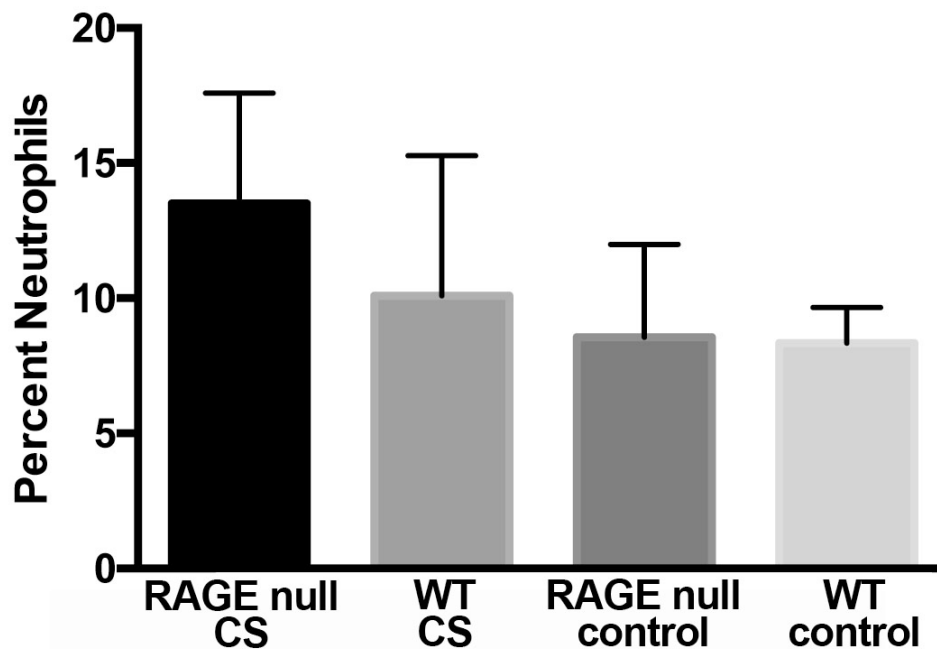

**Supplementary Figure 5. Absence of CS-induced oxidative stress in the lungs of RAGE null mice as compared with WT lungs is not due to fewer neutrophils.** The percentage of CD45 positive cells with a neutrophil phenotype as defined by cells that co-labeled with anti-Ly6G and anti-CD11b antibodies was measured by FACS. There was no difference in percentages of neutrophils between WT and RAGE null mice following 7 days of CS exposure. Three WT mice were exposed to CS, the rest of the groups consisted of 4 mice.

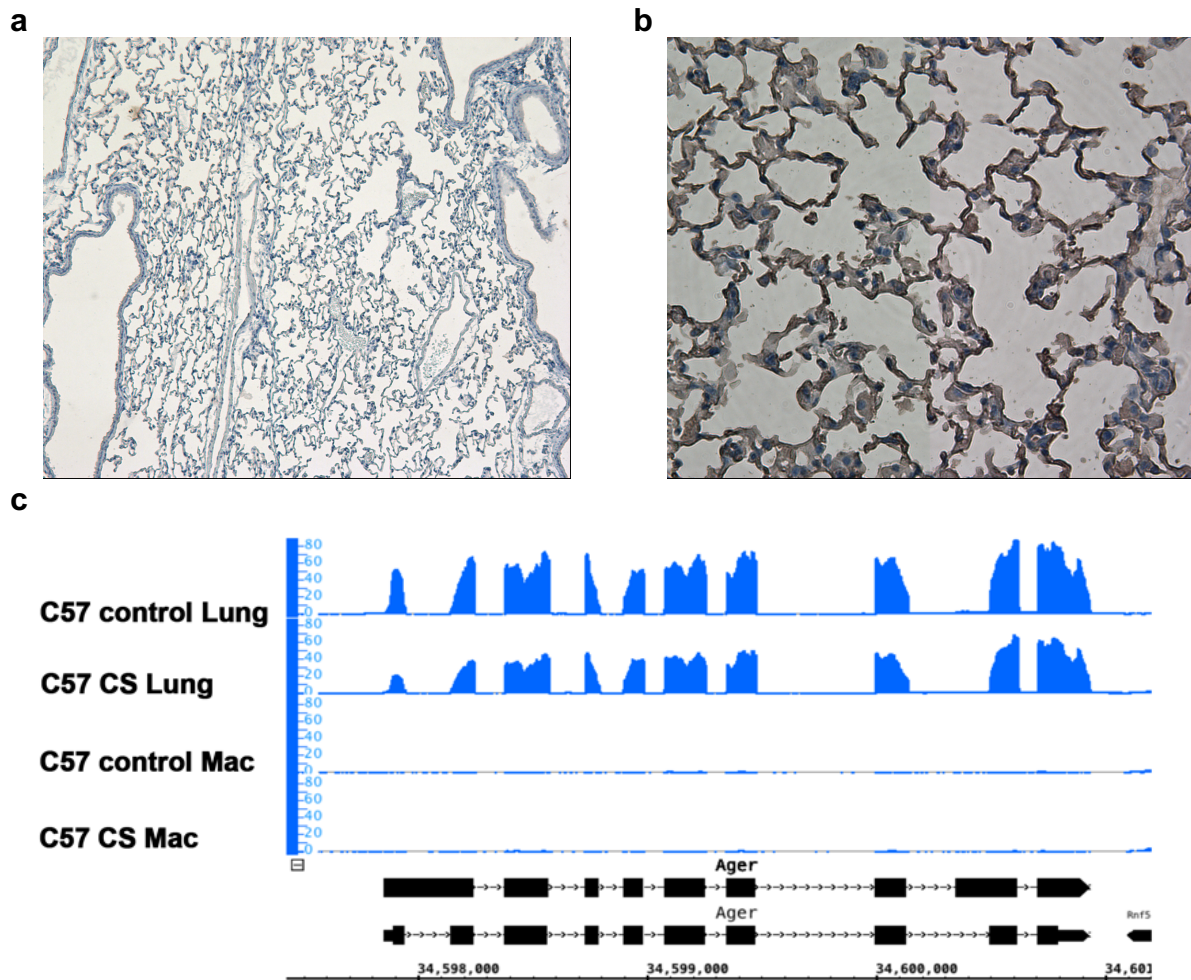

**Supplementary Figure 6. RAGE is expressed in lung parenchyma and not AM following prolonged CS exposure. (a)** Immunostaining of control RAGE null tissue with anti-RAGE antibodies demonstrates absence of stain and (therefore) the specificity of the antibody. **(b)** Lung tissue from WT mice exposed to CS for 4 months and stained with anti-RAGE antibodies demonstrates prominent RAGE expression in the alveolar septum. Cells within the alveoli with AM morphology also faintly immunostain for RAGE. **(c)** RNA sequencing data demonstrates minimal RAGE expression in AM exposed to 4 months CS. In contrast, RAGE is expressed in post-lavage lung tissue from these same mice.

Figure 7

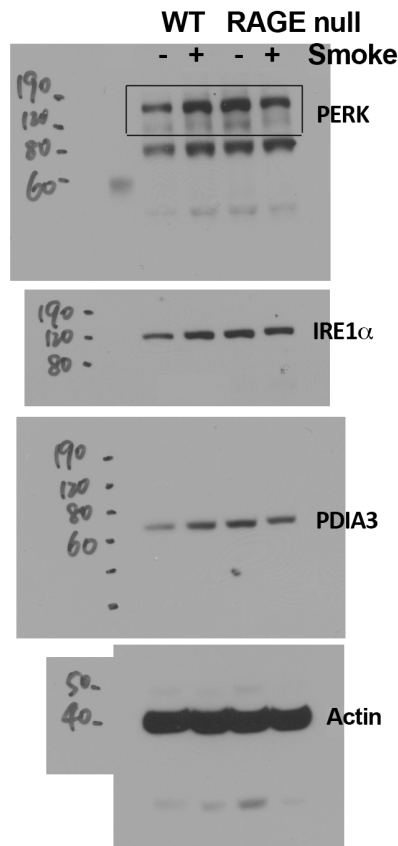

Figure 8

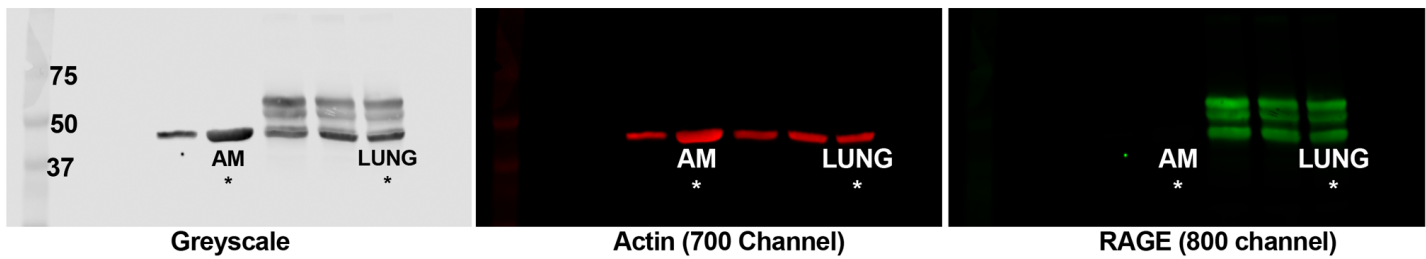

**Supplementary Figure 7. Complete western blot gels.** Western blot gels including protein loading references ( $\beta$ -actin) are shown for data presented in Figure 7 (PERK, IRE1 $\alpha$ , and PDIA3), and Figure 8b (RAGE).



**Supplementary Table 1.**

|                    |                                        |             | WT-<br>CTRL/R<br>AGE null-<br>CTRL<br>(Fold) | WT-<br>CTRL/R<br>AGE null-<br>CTRL<br>(FDR) | WT-<br>CS/WT-<br>CTRL<br>(Fold) | WT-<br>CS/WT-<br>CTRL<br>(FDR) | RAGE<br>null-<br>CS/RAG<br>E null-<br>CTRL<br>(Fold) | RAGE<br>null-<br>CS/RAG<br>E null-<br>CTRL<br>(FDR) | WT-<br>CS/RAG<br>E null-CS<br>(Fold) | WT-<br>CS/RAG<br>E null-CS<br>(FDR) |
|--------------------|----------------------------------------|-------------|----------------------------------------------|---------------------------------------------|---------------------------------|--------------------------------|------------------------------------------------------|-----------------------------------------------------|--------------------------------------|-------------------------------------|
|                    | Description                            | Symbol      |                                              |                                             |                                 |                                |                                                      |                                                     |                                      |                                     |
| ENSMUSG00000024125 | spermine binding protein-like [Sour    | Sbpl        | 0.728                                        | 0.000                                       | 5.135                           | 0.000                          | 0.795                                                | 0.000                                               | 4.705                                | 0.000                               |
| ENSMUSG00000047517 | deleted in malignant brain tumors 1    | Dmbt1       | 0.786                                        | 0.000                                       | 3.273                           | 0.000                          | 0.675                                                | 0.000                                               | 3.814                                | 0.000                               |
| ENSMUSG00000024768 | lipase, gastric [Source:MGI Symbol;    | Lipf        | 0.935                                        | 0.266                                       | 3.502                           | 0.000                          | 0.943                                                | 0.552                                               | 3.472                                | 0.000                               |
| ENSMUSG00000057417 | demilune cell and parotid protein 3    | Dcpp3       | 0.763                                        | 0.000                                       | 3.704                           | 0.000                          | 0.886                                                | 0.000                                               | 3.189                                | 0.000                               |
| ENSMUSG00000047228 | cDNA sequence BC048546 [Source:        | BC048546    | 0.829                                        | 0.000                                       | 2.876                           | 0.000                          | 0.801                                                | 0.000                                               | 2.974                                | 0.000                               |
| ENSMUSG00000032496 | lactotransferrin [Source:MGI Symbo     | Ltf         | 0.851                                        | 0.036                                       | 2.350                           | 0.000                          | 0.554                                                | 0.000                                               | 3.609                                | 0.000                               |
| ENSMUSG00000052305 | hemoglobin, beta adult major chain     | Hbb-b1      | 1.763                                        | 0.000                                       | 0.197                           | 0.000                          | 0.372                                                | 0.000                                               | 0.935                                | 0.000                               |
| ENSMUSG00000015519 | RIKEN cDNA 2310057J18 gene [Sour       | 310057J18Ri | 1.000                                        | 1.000                                       | 2.949                           | 0.000                          | 1.027                                                | 1.000                                               | 2.871                                | 0.000                               |
| ENSMUSG00000069919 | hemoglobin alpha, adult chain 1 [So    | Hba-a1      | 1.546                                        | 0.000                                       | 0.272                           | 0.000                          | 0.494                                                | 0.000                                               | 0.851                                | 0.000                               |
| ENSMUSG00000073940 | hemoglobin, beta adult minor chain     | Hbb-b2      | 1.486                                        | 0.000                                       | 0.342                           | 0.000                          | 0.606                                                | 0.000                                               | 0.838                                | 0.000                               |
| ENSMUSG00000022389 | thyrotroph embryonic factor [Sourc     | Tef         | 1.420                                        | 0.000                                       | 3.855                           | 0.000                          | 5.874                                                | 0.000                                               | 0.932                                | 0.765                               |
| ENSMUSG00000069917 | hemoglobin alpha, adult chain 2 [So    | Hba-a2      | 1.528                                        | 0.000                                       | 0.346                           | 0.000                          | 0.574                                                | 0.000                                               | 0.922                                | 0.003                               |
| ENSMUSG00000059824 | D site albumin promoter binding pr     | Dbp         | 1.111                                        | 0.089                                       | 3.341                           | 0.000                          | 3.381                                                | 0.000                                               | 1.097                                | 0.573                               |
| ENSMUSG00000067843 |                                        |             | 0.826                                        | 0.000                                       | 2.205                           | 0.000                          | 0.799                                                | 0.000                                               | 2.279                                | 0.000                               |
| ENSMUSG00000031785 | G protein-coupled receptor 56 [Sou     | Gpr56       | 0.214                                        | 0.000                                       | 1.981                           | 0.000                          | 0.775                                                | 0.018                                               | 0.548                                | 0.000                               |
| ENSMUSG00000090877 | heat shock protein 1B [Source:MGI      | Hspa1b      | 1.707                                        | 0.000                                       | 3.221                           | 0.000                          | 1.619                                                | 0.000                                               | 3.396                                | 0.000                               |
| ENSMUSG00000000983 | WAP four-disulfide core domain 18      | Wfdc18      | 0.927                                        | 0.180                                       | 1.851                           | 0.000                          | 0.935                                                | 0.565                                               | 1.837                                | 0.000                               |
| ENSMUSG00000029657 | heat shock 105kDa/110kDa protein       | Hsph1       | 0.762                                        | 0.001                                       | 2.731                           | 0.000                          | 1.297                                                | 0.020                                               | 1.604                                | 0.000                               |
| ENSMUSG00000025270 | aminolevulinic acid synthase 2, eryt   | Alas2       | 1.328                                        | 0.000                                       | 0.488                           | 0.000                          | 0.682                                                | 0.000                                               | 0.950                                | 0.065                               |
| ENSMUSG00000020889 | nuclear receptor subfamily 1, group    | Nr1d1       | 1.101                                        | 0.303                                       | 2.624                           | 0.000                          | 2.158                                                | 0.000                                               | 1.339                                | 0.003                               |
| ENSMUSG00000091971 | heat shock protein 1A [Source:MGI      | Hspa1a      | 1.929                                        | 0.000                                       | 3.062                           | 0.000                          | 1.815                                                | 0.000                                               | 3.253                                | 0.000                               |
| ENSMUSG00000030954 | glycoprotein 2 (zymogen granule m      | Gp2         | 0.826                                        | 0.000                                       | 1.997                           | 0.000                          | 0.987                                                | 0.955                                               | 1.670                                | 0.000                               |
| ENSMUSG00000027737 | solute carrier family 7 (cationic ami  | Slc7a11     | 2.579                                        | 0.000                                       | 2.557                           | 0.000                          | 2.854                                                | 0.000                                               | 2.310                                | 0.000                               |
| ENSMUSG00000021775 | nuclear receptor subfamily 1, group    | Nr1d2       | 1.191                                        | 0.029                                       | 2.399                           | 0.000                          | 2.451                                                | 0.000                                               | 1.166                                | 0.216                               |
| ENSMUSG00000030142 | C-type lectin domain family 4, mem     | Clec4e      | 1.532                                        | 0.000                                       | 2.411                           | 0.000                          | 2.287                                                | 0.000                                               | 1.615                                | 0.000                               |
| ENSMUSG00000060586 | histocompatibility 2, class II antigen | H2-Eb1      | 1.767                                        | 0.000                                       | 0.441                           | 0.000                          | 0.567                                                | 0.000                                               | 1.373                                | 0.000                               |
| ENSMUSG00000021187 | tandem C2 domains, nuclear [Sourc      | Tc2n        | 0.538                                        | 0.000                                       | 2.354                           | 0.000                          | 1.556                                                | 0.000                                               | 0.814                                | 0.046                               |
| ENSMUSG00000015656 | heat shock protein 8 [Source:MGI S     | Hspa8       | 0.629                                        | 0.000                                       | 2.290                           | 0.000                          | 1.148                                                | 0.570                                               | 1.256                                | 0.005                               |

|                    |                                        |          |       |       |       |       |       |       |       |       |
|--------------------|----------------------------------------|----------|-------|-------|-------|-------|-------|-------|-------|-------|
| ENSMUSG00000064057 | secretoglobin, family 3A, member 1     | Scgb3a1  | 0.729 | 0.000 | 2.330 | 0.000 | 0.926 | 0.970 | 1.834 | 0.000 |
| ENSMUSG00000055866 | period homolog 2 (Drosophila) [Sou     | Per2     | 0.971 | 0.823 | 2.101 | 0.000 | 3.039 | 0.000 | 0.671 | 0.000 |
| ENSMUSG00000036594 | histocompatibility 2, class II antigen | H2-Aa    | 1.795 | 0.000 | 0.454 | 0.000 | 0.575 | 0.000 | 1.417 | 0.000 |
| ENSMUSG00000092609 | predicted gene 20481 [Source:MGI       | Gm20481  | 1.657 | 0.000 | 2.511 | 0.000 | 1.600 | 0.000 | 2.601 | 0.000 |
| ENSMUSG00000038508 | growth differentiation factor 15 [So   | Gdf15    | 1.112 | 0.220 | 2.153 | 0.000 | 1.467 | 0.000 | 1.632 | 0.000 |
| ENSMUSG00000028957 | period homolog 3 (Drosophila) [Sou     | Per3     | 1.368 | 0.000 | 2.170 | 0.000 | 3.003 | 0.000 | 0.988 | 1.000 |
| ENSMUSG00000073421 | histocompatibility 2, class II antigen | H2-Ab1   | 1.676 | 0.000 | 0.481 | 0.000 | 0.607 | 0.000 | 1.329 | 0.000 |
| ENSMUSG00000047959 | potassium voltage-gated channel, s     | Kcna3    | 1.467 | 0.000 | 0.527 | 0.000 | 1.330 | 0.003 | 0.581 | 0.000 |
| ENSMUSG00000056749 | nuclear factor, interleukin 3, regulat | Nfil3    | 0.919 | 0.482 | 0.511 | 0.000 | 0.594 | 0.000 | 0.790 | 0.001 |
| ENSMUSG00000030144 | C-type lectin domain family 4, mem     | Clec4d   | 1.710 | 0.000 | 2.124 | 0.000 | 1.968 | 0.000 | 1.846 | 0.000 |
| ENSMUSG00000026390 | macrophage receptor with collagen      | Marco    | 2.137 | 0.000 | 2.045 | 0.000 | 1.885 | 0.000 | 2.318 | 0.000 |
| ENSMUSG00000024610 | CD74 antigen (invariant polypeptide    | Cd74     | 1.613 | 0.000 | 0.493 | 0.000 | 0.568 | 0.000 | 1.400 | 0.000 |
| ENSMUSG00000022096 | hairless [Source:MGI Symbol;Acc:M      | Hr       | 0.881 | 0.261 | 0.516 | 0.000 | 0.629 | 0.000 | 0.723 | 0.000 |
| ENSMUSG00000005547 | cytochrome P450, family 2, subfami     | Cyp2a5   | 0.862 | 0.114 | 2.145 | 0.000 | 1.296 | 0.001 | 1.426 | 0.000 |
| ENSMUSG00000015837 | sequestosome 1 [Source:MGI Symb        | Sqstm1   | 1.010 | 0.995 | 1.968 | 0.000 | 1.228 | 0.141 | 1.618 | 0.000 |
| ENSMUSG00000026864 | heat shock protein 5 [Source:MGI S     | Hspa5    | 0.646 | 0.000 | 1.968 | 0.000 | 0.867 | 0.283 | 1.466 | 0.000 |
| ENSMUSG00000063011 | mesothelin [Source:MGI Symbol;Ac       | Msln     | 0.821 | 0.027 | 1.607 | 0.000 | 0.728 | 0.000 | 1.814 | 0.000 |
| ENSMUSG00000005413 | heme oxygenase (decycling) 1 [Sour     | Hmox1    | 2.033 | 0.000 | 2.036 | 0.000 | 1.582 | 0.000 | 2.617 | 0.000 |
| ENSMUSG00000068735 | transformation related protein 53 in   | Trp53i11 | 0.755 | 0.003 | 0.566 | 0.000 | 0.797 | 0.007 | 0.535 | 0.000 |
| ENSMUSG00000021270 | heat shock protein 90, alpha (cytoso   | Hsp90aa1 | 0.895 | 0.210 | 1.935 | 0.000 | 1.325 | 0.002 | 1.308 | 0.000 |
| ENSMUSG00000025150 | carbonyl reductase 2 [Source:MGI S     | Cbr2     | 0.769 | 0.002 | 2.009 | 0.000 | 1.245 | 0.014 | 1.242 | 0.040 |
| ENSMUSG00000093327 | microRNA 5107 [Source:MGI Symbo        | Mir5107  | 1.568 | 0.000 | 0.537 | 0.000 | 0.623 | 0.000 | 1.351 | 0.000 |
| ENSMUSG00000030017 | regenerating islet-derived 3 gamma     | Reg3g    | 0.665 | 0.000 | 1.900 | 0.000 | 0.848 | 0.648 | 1.490 | 0.000 |
| ENSMUSG00000073902 | predicted gene 1966 [Source:MGI S      | Gm1966   | 1.535 | 0.000 | 0.593 | 0.000 | 1.309 | 0.001 | 0.695 | 0.000 |
| ENSMUSG00000022769 | stromal cell-derived factor 2-like 1 [ | Sdf2l1   | 0.696 | 0.000 | 1.843 | 0.000 | 1.035 | 0.975 | 1.238 | 0.017 |
| ENSMUSG00000038791 | secretoglobin, family 3A, member 2     | Scgb3a2  | 0.824 | 0.022 | 1.925 | 0.000 | 1.086 | 0.615 | 1.461 | 0.000 |
| ENSMUSG00000074280 | predicted gene 6166 [Source:MGI S      | Gm6166   | 1.139 | 0.844 | 1.854 | 0.000 | 0.555 | 0.000 | 3.803 | 0.000 |
| ENSMUSG00000023272 | cysteine-rich with EGF-like domains    | Creld2   | 0.705 | 0.000 | 1.780 | 0.000 | 1.002 | 0.992 | 1.253 | 0.006 |
| ENSMUSG00000020836 | coronin 6 [Source:MGI Symbol;Acc:      | Coro6    | 1.583 | 0.000 | 0.578 | 0.000 | 1.139 | 0.658 | 0.803 | 0.007 |
| ENSMUSG00000018581 | dynein, axonemal, heavy chain 11 [S    | Dnahc11  | 1.639 | 0.000 | 0.568 | 0.000 | 0.912 | 0.675 | 1.020 | 0.966 |
| ENSMUSG00000089901 | predicted gene 8113 [Source:MGI S      | Gm8113   | 1.334 | 0.001 | 0.561 | 0.000 | 1.066 | 0.938 | 0.703 | 0.000 |
| ENSMUSG00000024190 | dual specificity phosphatase 1 [Sour   | Dusp1    | 1.933 | 0.000 | 0.582 | 0.000 | 0.942 | 0.989 | 1.195 | 0.267 |
| ENSMUSG00000025351 | CD63 antigen [Source:MGI Symbol;       | Cd63     | 0.951 | 0.720 | 1.745 | 0.000 | 1.284 | 0.006 | 1.293 | 0.000 |
| ENSMUSG00000037706 | CD81 antigen [Source:MGI Symbol;       | Cd81     | 1.055 | 0.812 | 1.721 | 0.000 | 1.515 | 0.000 | 1.199 | 0.013 |

|                    |                                          |          |       |       |       |       |       |       |       |       |
|--------------------|------------------------------------------|----------|-------|-------|-------|-------|-------|-------|-------|-------|
| ENSMUSG00000028378 | prostaglandin reductase 1 [Source:       | Ptgr1    | 1.441 | 0.000 | 1.755 | 0.000 | 1.434 | 0.000 | 1.764 | 0.000 |
| ENSMUSG00000054422 | fatty acid binding protein 1, liver [So  | Fabp1    | 1.165 | 0.204 | 0.572 | 0.000 | 0.855 | 0.197 | 0.778 | 0.001 |
| ENSMUSG00000022504 | class II transactivator [Source:MGI S    | Ciita    | 1.416 | 0.000 | 0.613 | 0.000 | 0.862 | 0.051 | 1.007 | 1.000 |
| ENSMUSG00000023913 | phospholipase A2, group VII (platele     | Pla2g7   | 0.357 | 0.000 | 1.693 | 0.000 | 1.372 | 0.003 | 0.440 | 0.000 |
| ENSMUSG00000063286 | predicted gene 8995 [Source:MGI S        | Gm8995   | 1.727 | 0.000 | 0.599 | 0.000 | 1.430 | 0.000 | 0.723 | 0.000 |
| ENSMUSG00000026177 | solute carrier family 11 (proton-cou     | Slc11a1  | 1.976 | 0.000 | 1.787 | 0.000 | 2.029 | 0.000 | 1.741 | 0.000 |
| ENSMUSG00000020572 | nicotinamide phosphoribosyltransfe       | Nampt    | 1.349 | 0.000 | 1.740 | 0.000 | 1.485 | 0.000 | 1.581 | 0.000 |
| ENSMUSG00000001025 | S100 calcium binding protein A6 (ca      | S100a6   | 0.851 | 0.143 | 0.580 | 0.000 | 0.578 | 0.000 | 0.855 | 0.048 |
| ENSMUSG00000032802 | sulfiredoxin 1 homolog (S. cerevisia     | Srxn1    | 1.736 | 0.000 | 1.773 | 0.000 | 1.632 | 0.000 | 1.886 | 0.000 |
| ENSMUSG00000001020 | S100 calcium binding protein A4 [So      | S100a4   | 1.172 | 0.105 | 0.577 | 0.000 | 0.545 | 0.000 | 1.241 | 0.015 |
| ENSMUSG00000030413 | peptidoglycan recognition protein 1      | Pglyrp1  | 0.871 | 0.154 | 1.553 | 0.000 | 0.870 | 0.519 | 1.555 | 0.000 |
| ENSMUSG00000039013 | sialic acid binding Ig-like lectin 5 [So | Siglec5  | 0.894 | 0.365 | 0.612 | 0.000 | 0.655 | 0.000 | 0.836 | 0.020 |
| ENSMUSG00000024298 | zinc finger protein 871 [Source:MGI      | Zfp871   | 1.487 | 0.000 | 0.626 | 0.000 | 1.195 | 0.150 | 0.779 | 0.001 |
| ENSMUSG00000037355 | RIKEN cDNA 4933407H18 gene [Souc         | 18Ri     | 1.462 | 0.000 | 0.622 | 0.000 | 1.108 | 0.723 | 0.821 | 0.020 |
| ENSMUSG00000023944 | heat shock protein 90 alpha (cytoso      | Hsp90ab1 | 0.919 | 0.432 | 1.668 | 0.000 | 1.383 | 0.000 | 1.108 | 0.363 |
| ENSMUSG00000024966 | stress-induced phosphoprotein 1 [S       | Stip1    | 0.806 | 0.006 | 1.664 | 0.000 | 1.204 | 0.112 | 1.115 | 0.362 |
| ENSMUSG00000020250 | thioredoxin reductase 1 [Source:MG       | Txnrd1   | 1.399 | 0.000 | 1.681 | 0.000 | 1.470 | 0.000 | 1.599 | 0.000 |
| ENSMUSG00000032575 | mesencephalic astrocyte-derived ne       | Manf     | 0.730 | 0.000 | 1.652 | 0.000 | 0.860 | 0.178 | 1.401 | 0.000 |
| ENSMUSG00000022126 | immunoresponsive gene 1 [Source:         | Irg1     | 1.288 | 0.001 | 1.700 | 0.000 | 1.551 | 0.000 | 1.411 | 0.000 |
| ENSMUSG00000032115 | hypoxia up-regulated 1 [Source:MG        | Hyou1    | 0.702 | 0.000 | 1.631 | 0.000 | 0.956 | 0.909 | 1.197 | 0.051 |
| ENSMUSG00000026463 | ATPase, Ca++ transporting, plasma        | Atp2b4   | 0.733 | 0.000 | 0.641 | 0.000 | 0.716 | 0.000 | 0.656 | 0.000 |
| ENSMUSG00000019577 | pyruvate dehydrogenase kinase, iso       | Pdk4     | 0.535 | 0.000 | 0.646 | 0.000 | 0.726 | 0.000 | 0.476 | 0.000 |
| ENSMUSG00000025823 | protein disulfide isomerase associat     | Pdia4    | 0.755 | 0.000 | 1.633 | 0.000 | 1.086 | 0.765 | 1.134 | 0.300 |
| ENSMUSG00000036585 | fibroblast growth factor 1 [Source:M     | Fgf1     | 1.386 | 0.000 | 0.634 | 0.000 | 1.000 | 0.992 | 0.878 | 0.070 |
| ENSMUSG00000001774 | cysteine and histidine-rich domain (     | Chordc1  | 0.828 | 0.038 | 1.668 | 0.000 | 1.084 | 0.751 | 1.275 | 0.003 |
| ENSMUSG00000017723 | WAP four-disulfide core domain 2 [S      | Wfdc2    | 0.623 | 0.000 | 1.679 | 0.000 | 0.903 | 0.833 | 1.160 | 0.296 |
| ENSMUSG00000000275 | tripartite motif-containing 25 [Sourc    | Trim25   | 1.202 | 0.022 | 0.627 | 0.000 | 0.953 | 0.938 | 0.791 | 0.002 |
| ENSMUSG00000019916 | procollagen-proline, 2-oxoglutarate      | P4ha1    | 0.827 | 0.017 | 1.626 | 0.000 | 1.181 | 0.181 | 1.138 | 0.221 |
| ENSMUSG00000027435 | CD93 antigen [Source:MGI Symbol;         | Cd93     | 1.316 | 0.000 | 1.552 | 0.000 | 1.146 | 0.283 | 1.783 | 0.000 |
| ENSMUSG00000092528 | NLR family, pyrin domain containing      | Nlrp1c   | 1.403 | 0.000 | 0.626 | 0.000 | 1.003 | 0.951 | 0.875 | 0.169 |
| ENSMUSG00000070369 | integrin, alpha D [Source:MGI Symb       | Itgad    | 1.213 | 0.010 | 0.650 | 0.000 | 0.832 | 0.039 | 0.948 | 0.785 |
| ENSMUSG00000053279 | aldehyde dehydrogenase family 1, s       | Aldh1a1  | 0.836 | 0.055 | 1.710 | 0.000 | 1.006 | 1.000 | 1.420 | 0.000 |
| ENSMUSG00000000982 | chemokine (C-C motif) ligand 3 [Sou      | Ccl3     | 1.237 | 0.004 | 1.624 | 0.000 | 1.291 | 0.001 | 1.556 | 0.000 |
| ENSMUSG00000024892 | pyruvate carboxylase [Source:MGI S       | Pcx      | 1.071 | 0.668 | 1.554 | 0.000 | 1.458 | 0.000 | 1.142 | 0.127 |

|                     |                                       |            |       |       |       |       |       |       |       |       |
|---------------------|---------------------------------------|------------|-------|-------|-------|-------|-------|-------|-------|-------|
| ENSMUSG00000045193  | cold inducible RNA binding protein [  | Cirbp      | 1.327 | 0.000 | 0.631 | 0.000 | 0.928 | 0.792 | 0.903 | 0.393 |
| ENSMUSG00000058427  | chemokine (C-X-C motif) ligand 2 [S   | Cxcl2      | 2.039 | 0.000 | 1.686 | 0.000 | 1.697 | 0.000 | 2.025 | 0.000 |
| ENSMUSG00000014905  | DnaJ (Hsp40) homolog, subfamily B,    | Dnajb9     | 0.672 | 0.000 | 1.573 | 0.000 | 0.871 | 0.437 | 1.214 | 0.122 |
| ENSMUSG00000020048  | heat shock protein 90, beta (Grp94)   | Hsp90b1    | 0.839 | 0.039 | 1.580 | 0.000 | 1.186 | 0.129 | 1.118 | 0.345 |
| ENSMUSG00000079227  | chemokine (C-C motif) receptor 5 [S   | Ccr5       | 0.705 | 0.000 | 0.632 | 0.000 | 0.568 | 0.000 | 0.785 | 0.000 |
| ENSMUSG00000039646  | vasorin [Source:MGI Symbol;Acc:M      | Vasn       | 1.250 | 0.007 | 0.657 | 0.000 | 1.027 | 1.000 | 0.800 | 0.003 |
| ENSMUSG00000047735  | sterile alpha motif domain containin  | Samd9l     | 1.674 | 0.000 | 0.638 | 0.000 | 1.228 | 0.088 | 0.870 | 0.255 |
| ENSMUSG00000022512  | claudin 1 [Source:MGI Symbol;Acc:     | Cldn1      | 0.921 | 0.489 | 0.645 | 0.000 | 0.920 | 0.675 | 0.646 | 0.000 |
| ENSMUSG00000030357  | FK506 binding protein 4 [Source:MG    | Fkbp4      | 0.750 | 0.000 | 1.580 | 0.000 | 1.228 | 0.048 | 0.964 | 0.936 |
| ENSMUSG00000039218  | serine/arginine repetitive matrix 2 [ | Srrm2      | 1.522 | 0.000 | 0.654 | 0.000 | 1.193 | 0.180 | 0.834 | 0.052 |
| ENSMUSG00000023088  | ATP-binding cassette, sub-family C (  | Abcc1      | 1.490 | 0.000 | 1.598 | 0.000 | 1.620 | 0.000 | 1.469 | 0.000 |
| ENSMUSG00000033705  | START domain containing 9 [Source     | Stard9     | 1.672 | 0.000 | 0.655 | 0.000 | 1.146 | 0.420 | 0.955 | 0.883 |
| ENSMUSG00000019122  | chemokine (C-C motif) ligand 9 [Sou   | Ccl9       | 0.565 | 0.000 | 1.545 | 0.000 | 0.971 | 0.008 | 0.899 | 0.312 |
| ENSMUSG00000044217  | aquaporin 5 [Source:MGI Symbol;Ac     | Aqp5       | 0.429 | 0.000 | 1.428 | 0.000 | 0.840 | 0.344 | 0.729 | 0.002 |
| ENSMUSG00000035545  | leukocyte receptor cluster (LRC) me   | Leng8      | 1.696 | 0.000 | 0.656 | 0.000 | 1.207 | 0.255 | 0.921 | 0.724 |
| ENSMUSG00000070390  | NLR family, pyrin domain containing   | Nlrp1b     | 1.570 | 0.000 | 0.649 | 0.000 | 1.044 | 0.994 | 0.976 | 0.994 |
| ENSMUSG00000028124  | glutamate-cysteine ligase, modifier   | Gclm       | 1.634 | 0.000 | 1.608 | 0.000 | 1.528 | 0.000 | 1.720 | 0.000 |
| ENSMUSG00000025980  | heat shock protein 1 (chaperonin) [   | Hspd1      | 0.892 | 0.228 | 1.569 | 0.000 | 1.157 | 0.340 | 1.209 | 0.021 |
| ENSMUSG00000085814  |                                       |            | 0.864 | 0.108 | 1.563 | 0.000 | 1.158 | 0.232 | 1.165 | 0.121 |
| ENSMUSG000000051682 | triggering receptor expressed on m    | Trem14     | 1.380 | 0.000 | 1.577 | 0.000 | 1.606 | 0.000 | 1.355 | 0.000 |
| ENSMUSG000000055897 | protein phosphatase 4, regulatory s   | Ppp4r1l-ps | 1.526 | 0.000 | 0.637 | 0.000 | 1.054 | 0.965 | 0.922 | 0.709 |
| ENSMUSG00000024401  | tumor necrosis factor [Source:MGI     | Tnf        | 1.348 | 0.000 | 1.598 | 0.000 | 1.418 | 0.000 | 1.519 | 0.000 |
| ENSMUSG00000020571  | protein disulfide isomerase associat  | Pdia6      | 0.781 | 0.002 | 1.552 | 0.000 | 1.062 | 0.884 | 1.141 | 0.242 |
| ENSMUSG00000040663  | cardiotrophin-like cytokine factor 1  | Clcf1      | 1.507 | 0.000 | 0.628 | 0.000 | 0.900 | 0.352 | 1.052 | 0.812 |
| ENSMUSG00000001588  | ArfGAP with coiled-coil, ankyrin rep  | Acap1      | 1.102 | 0.382 | 0.662 | 0.000 | 0.920 | 0.594 | 0.793 | 0.004 |
| ENSMUSG00000021256  | vasohibin 1 [Source:MGI Symbol;Ac     | Vash1      | 1.308 | 0.000 | 0.659 | 0.000 | 0.755 | 0.000 | 1.140 | 0.217 |
| ENSMUSG00000024653  | secretoglobin, family 1A, member 1    | Scgb1a1    | 0.805 | 0.007 | 1.562 | 0.000 | 0.757 | 0.000 | 1.660 | 0.000 |
| ENSMUSG00000052974  | cytochrome P450, family 2, subfami    | Cyp2f2     | 0.746 | 0.001 | 1.527 | 0.000 | 0.806 | 0.074 | 1.414 | 0.000 |
| ENSMUSG000000092686 |                                       | AC152453.1 | 0.825 | 0.008 | 1.501 | 0.000 | 1.269 | 0.007 | 0.975 | 0.981 |
| ENSMUSG00000025934  | glutathione S-transferase, alpha 3 [S | Gsta3      | 1.067 | 0.579 | 1.624 | 0.000 | 1.242 | 0.016 | 1.395 | 0.000 |
| ENSMUSG000000055116 | aryl hydrocarbon receptor nuclear t   | Arntl      | 0.950 | 0.728 | 0.675 | 0.000 | 0.594 | 0.000 | 1.081 | 0.646 |
| ENSMUSG00000027483  | BPI fold containing family A, membe   | Bpifa1     | 0.829 | 0.049 | 1.425 | 0.000 | 0.645 | 0.000 | 1.833 | 0.000 |
| ENSMUSG00000022136  | DnaJ (Hsp40) homolog, subfamily C,    | Dnajc3     | 0.753 | 0.000 | 1.521 | 0.000 | 0.968 | 0.963 | 1.183 | 0.104 |
| ENSMUSG00000028111  | cathepsin K [Source:MGI Symbol;Ac     | Ctsk       | 1.299 | 0.001 | 1.535 | 0.000 | 1.039 | 0.963 | 1.918 | 0.000 |

|                     |                                                |          |       |       |       |       |       |       |       |       |
|---------------------|------------------------------------------------|----------|-------|-------|-------|-------|-------|-------|-------|-------|
| ENSMUSG00000044103  | interleukin 1 family, member 9 [Sou            | Il1f9    | 1.320 | 0.000 | 1.501 | 0.000 | 1.629 | 0.000 | 1.215 | 0.115 |
| ENSMUSG00000000823  | zinc finger protein 512B [Source:MG            | Znf512b  | 1.359 | 0.000 | 0.665 | 0.000 | 1.039 | 0.989 | 0.870 | 0.225 |
| ENSMUSG00000028410  | DnaJ (Hsp40) homolog, subfamily A,             | Dnaja1   | 0.841 | 0.100 | 1.567 | 0.000 | 0.998 | 1.000 | 1.321 | 0.000 |
| ENSMUSG00000021701  | polo-like kinase 2 [Source:MGI Sym             | Plk2     | 1.214 | 0.004 | 1.562 | 0.000 | 1.360 | 0.000 | 1.395 | 0.000 |
| ENSMUSG00000039234  | Sec24 related gene family, member              | Sec24d   | 0.995 | 0.796 | 1.500 | 0.000 | 1.142 | 0.676 | 1.307 | 0.000 |
| ENSMUSG00000003814  | calreticulin [Source:MGI Symbol;Acc            | Calr     | 0.819 | 0.015 | 1.510 | 0.000 | 1.143 | 0.395 | 1.083 | 0.637 |
| ENSMUSG00000003545  | FBJ osteosarcoma oncogene B [Sour              | Fosb     | 1.535 | 0.000 | 0.681 | 0.000 | 0.975 | 0.925 | 1.073 | 0.588 |
| ENSMUSG00000040466  | biliverdin reductase B (flavin reduct          | Blvrb    | 1.505 | 0.000 | 1.536 | 0.000 | 1.381 | 0.000 | 1.675 | 0.000 |
| ENSMUSG000000084956 | predicted gene 16194 [Source:MGI               | Gm16194  | 1.547 | 0.000 | 0.686 | 0.000 | 1.352 | 0.000 | 0.785 | 0.002 |
| ENSMUSG00000037944  | chemokine (C-C motif) receptor 7 [S            | Ccr7     | 1.219 | 0.051 | 0.654 | 0.000 | 0.579 | 0.000 | 1.378 | 0.000 |
| ENSMUSG00000044783  | Holliday junction recognition protei           | Hjrp     | 1.755 | 0.000 | 0.671 | 0.000 | 1.505 | 0.000 | 0.783 | 0.009 |
| ENSMUSG00000029455  | aldehyde dehydrogenase 2, mitoch               | Aldh2    | 1.188 | 0.047 | 1.510 | 0.000 | 1.357 | 0.000 | 1.322 | 0.000 |
| ENSMUSG00000058135  | glutathione S-transferase, mu 1 [So            | Gstm1    | 1.294 | 0.000 | 1.505 | 0.000 | 1.336 | 0.001 | 1.458 | 0.000 |
| ENSMUSG00000015120  | ubiquitin-conjugating enzyme E2I [S            | Ube2i    | 1.544 | 0.000 | 0.677 | 0.000 | 1.222 | 0.100 | 0.855 | 0.164 |
| ENSMUSG00000030218  | matrix Gla protein [Source:MGI Sym             | Mgp      | 1.068 | 0.873 | 1.517 | 0.000 | 1.717 | 0.000 | 0.944 | 1.000 |
| ENSMUSG00000025019  | ligand dependent nuclear receptor              | Lcor     | 1.543 | 0.000 | 0.692 | 0.000 | 1.293 | 0.001 | 0.826 | 0.028 |
| ENSMUSG00000024299  | a disintegrin-like and metallopeptid           | Adamts10 | 1.554 | 0.000 | 0.681 | 0.000 | 1.117 | 0.762 | 0.947 | 0.875 |
| ENSMUSG00000054986  | SEC14-like 3 ( <i>S. cerevisiae</i> ) [Source: | Sec14i3  | 0.781 | 0.007 | 1.576 | 0.000 | 1.114 | 0.613 | 1.105 | 0.680 |
| ENSMUSG00000000204  | schlafen 4 [Source:MGI Symbol;Acc:             | Slf4     | 1.551 | 0.000 | 0.657 | 0.000 | 0.948 | 0.871 | 1.075 | 0.759 |
| ENSMUSG00000050075  | G protein-coupled receptor 171 [So             | Gpr171   | 0.761 | 0.000 | 0.714 | 0.000 | 0.617 | 0.000 | 0.881 | 0.136 |
| ENSMUSG00000000244  | tetraspanin 32 [Source:MGI Symbol              | Tspan32  | 1.809 | 0.000 | 1.485 | 0.000 | 1.652 | 0.000 | 1.626 | 0.000 |
| ENSMUSG00000029379  | chemokine (C-X-C motif) ligand 3 [S            | Cxcl3    | 1.576 | 0.000 | 1.549 | 0.000 | 1.357 | 0.001 | 1.798 | 0.000 |
| ENSMUSG00000047036  | zinc finger protein 445 [Source:MGI            | Zfp445   | 1.511 | 0.000 | 0.697 | 0.000 | 1.223 | 0.056 | 0.861 | 0.159 |
| ENSMUSG00000003352  | calcium channel, voltage-dependen              | Cacnb3   | 1.311 | 0.009 | 0.640 | 0.000 | 0.626 | 0.000 | 1.339 | 0.000 |
| ENSMUSG000000068742 | cryptochrome 2 (photolyase-like) [S            | Cry2     | 1.093 | 0.306 | 1.456 | 0.000 | 1.835 | 0.000 | 0.867 | 0.296 |
| ENSMUSG00000029762  | aldo-keto reductase family 1, memb             | Akr1b8   | 1.425 | 0.000 | 1.519 | 0.000 | 1.191 | 0.094 | 1.818 | 0.000 |
| ENSMUSG00000059937  |                                                |          | 1.897 | 0.000 | 0.693 | 0.000 | 1.396 | 0.000 | 0.941 | 0.816 |
| ENSMUSG00000073418  | complement component 4B (Chido                 | C4b      | 0.601 | 0.000 | 0.762 | 0.000 | 0.876 | 0.273 | 0.523 | 0.000 |
| ENSMUSG00000043953  | chemokine (C-C motif) receptor-like            | Ccr12    | 1.361 | 0.000 | 1.445 | 0.000 | 1.548 | 0.000 | 1.271 | 0.001 |
| ENSMUSG00000049866  | ADP-ribosylation factor-like 4C [Sou           | Arl4c    | 0.854 | 0.105 | 0.703 | 0.000 | 0.601 | 0.000 | 1.000 | 0.797 |
| ENSMUSG00000021996  | esterase D/formylglutathione hydro             | Esd      | 1.401 | 0.000 | 1.478 | 0.000 | 1.322 | 0.001 | 1.566 | 0.000 |
| ENSMUSG00000078942  | NLR family, apoptosis inhibitory pro           | Naip6    | 1.578 | 0.000 | 0.702 | 0.000 | 1.188 | 0.122 | 0.933 | 0.701 |
| ENSMUSG00000028691  | peroxiredoxin 1 [Source:MGI Symbo              | Prdx1    | 1.364 | 0.000 | 1.456 | 0.000 | 1.255 | 0.027 | 1.582 | 0.000 |
| ENSMUSG00000037411  | serine (or cysteine) peptidase inhibi          | Serpine1 | 0.891 | 0.155 | 1.403 | 0.000 | 1.503 | 0.000 | 0.832 | 0.064 |

|                    |                                        |           |       |       |       |       |       |       |       |       |
|--------------------|----------------------------------------|-----------|-------|-------|-------|-------|-------|-------|-------|-------|
| ENSMUSG00000024074 | cysteine rich transmembrane BMP r      | Crim1     | 0.353 | 0.000 | 1.308 | 0.000 | 1.045 | 0.943 | 0.442 | 0.000 |
| ENSMUSG00000043017 | prostaglandin I receptor (IP) [Source  | Ptgir     | 1.531 | 0.000 | 1.429 | 0.000 | 1.304 | 0.001 | 1.678 | 0.000 |
| ENSMUSG00000029581 | fascin homolog 1, actin bundling pro   | Fscn1     | 1.228 | 0.048 | 0.684 | 0.000 | 0.564 | 0.000 | 1.489 | 0.000 |
| ENSMUSG00000020893 | period homolog 1 (Drosophila) [Sou     | Per1      | 1.724 | 0.000 | 0.731 | 0.000 | 1.538 | 0.000 | 0.819 | 0.013 |
| ENSMUSG00000036875 | DNA replication helicase 2 homolog     | Dna2      | 1.521 | 0.000 | 0.719 | 0.000 | 1.123 | 0.452 | 0.975 | 0.941 |
| ENSMUSG00000038776 | epoxide hydrolase 1, microsomal [S     | Ephx1     | 1.210 | 0.013 | 1.383 | 0.000 | 1.111 | 0.585 | 1.506 | 0.000 |
| ENSMUSG00000031762 | metallothionein 2 [Source:MGI Sym      | Mt2       | 1.723 | 0.000 | 1.485 | 0.000 | 1.288 | 0.033 | 1.987 | 0.000 |
| ENSMUSG00000074604 | microsomal glutathione S-transfera     | Mgst2     | 1.451 | 0.000 | 1.410 | 0.000 | 1.308 | 0.001 | 1.565 | 0.000 |
| ENSMUSG00000024597 | solute carrier family 12, member 2 [   | Slc12a2   | 0.619 | 0.000 | 1.251 | 0.000 | 0.877 | 0.492 | 0.884 | 0.898 |
| ENSMUSG00000045394 | epithelial cell adhesion molecule [So  | Epcam     | 0.482 | 0.000 | 0.691 | 0.000 | 0.718 | 0.000 | 0.463 | 0.000 |
| ENSMUSG00000027533 | fatty acid binding protein 5, epiderm  | Fabp5     | 1.402 | 0.002 | 0.693 | 0.000 | 1.546 | 0.000 | 0.629 | 0.000 |
| ENSMUSG00000064147 | RAB44, member RAS oncogene fam         | Rab44     | 1.522 | 0.000 | 0.745 | 0.000 | 1.143 | 0.417 | 0.993 | 1.000 |
| ENSMUSG00000028341 | nuclear receptor subfamily 4, group    | Nr4a3     | 1.203 | 0.051 | 0.720 | 0.000 | 0.638 | 0.000 | 1.358 | 0.000 |
| ENSMUSG00000003849 | NAD(P)H dehydrogenase, quinone 1       | Nqo1      | 1.523 | 0.000 | 1.407 | 0.000 | 1.398 | 0.000 | 1.532 | 0.000 |
| ENSMUSG00000029380 | chemokine (C-X-C motif) ligand 1 [S    | Cxcl1     | 1.279 | 0.000 | 1.438 | 0.000 | 1.159 | 0.109 | 1.586 | 0.000 |
| ENSMUSG00000078122 | RIKEN cDNA F630028O10 gene [Souc       | 0028O10Ri | 1.572 | 0.000 | 0.744 | 0.000 | 1.028 | 1.000 | 1.138 | 0.278 |
| ENSMUSG00000021360 | glucosaminyl (N-acetyl) transferase    | Gcnt2     | 0.626 | 0.000 | 0.748 | 0.000 | 0.759 | 0.000 | 0.617 | 0.000 |
| ENSMUSG00000027994 | coiled-coil domain containing 109B     | Ccdc109b  | 0.691 | 0.000 | 0.719 | 0.000 | 0.982 | 0.906 | 0.506 | 0.000 |
| ENSMUSG00000020340 | cytoplasmic FMR1 interacting prote     | Cyfp2     | 1.388 | 0.000 | 1.352 | 0.000 | 1.514 | 0.000 | 1.239 | 0.003 |
| ENSMUSG00000050359 | small proline-rich protein 1A [Sourc   | Sprr1a    | 0.540 | 0.000 | 0.809 | 0.000 | 0.663 | 0.000 | 0.659 | 0.000 |
| ENSMUSG00000031779 | chemokine (C-C motif) ligand 22 [So    | Ccl22     | 1.147 | 0.206 | 0.731 | 0.000 | 0.600 | 0.000 | 1.396 | 0.000 |
| ENSMUSG00000024140 | endothelial PAS domain protein 1 [S    | Epas1     | 1.817 | 0.000 | 1.326 | 0.000 | 1.131 | 0.225 | 2.131 | 0.000 |
| ENSMUSG00000027187 | catalase [Source:MGI Symbol;Acc:M      | Cat       | 1.461 | 0.000 | 1.333 | 0.001 | 1.563 | 0.000 | 1.246 | 0.005 |
| ENSMUSG00000035299 | midline 1 [Source:MGI Symbol;Acc:      | Mid1      | 0.512 | 0.000 | 0.806 | 0.001 | 1.303 | 0.007 | 0.317 | 0.000 |
| ENSMUSG00000020101 | RIKEN cDNA 4632428N05 gene [Souc       | 05Ri      | 0.648 | 0.000 | 1.306 | 0.001 | 1.008 | 0.985 | 0.839 | 0.033 |
| ENSMUSG00000031765 | metallothionein 1 [Source:MGI Sym      | Mt1       | 1.558 | 0.000 | 1.385 | 0.001 | 1.284 | 0.018 | 1.680 | 0.000 |
| ENSMUSG00000026193 | fibronectin 1 [Source:MGI Symbol;A     | Fn1       | 0.637 | 0.000 | 0.768 | 0.001 | 0.653 | 0.000 | 0.750 | 0.000 |
| ENSMUSG00000035783 | actin, alpha 2, smooth muscle, aort    | Acta2     | 1.251 | 0.003 | 1.359 | 0.001 | 1.127 | 0.489 | 1.509 | 0.000 |
| ENSMUSG00000085148 | Mir22 host gene (non-protein codin     | Mir22hg   | 1.541 | 0.000 | 0.768 | 0.001 | 1.053 | 0.955 | 1.125 | 0.287 |
| ENSMUSG00000020044 | tissue inhibitor of metalloproteinas   | Timp3     | 0.559 | 0.000 | 1.277 | 0.001 | 0.877 | 0.624 | 0.815 | 0.046 |
| ENSMUSG00000010651 | acetyl-Coenzyme A acyltransferase      | Acaa1b    | 0.782 | 0.003 | 0.767 | 0.001 | 1.147 | 0.496 | 0.524 | 0.000 |
| ENSMUSG00000020334 | solute carrier family 22 (organic cati | Slc22a4   | 1.511 | 0.000 | 1.332 | 0.001 | 1.314 | 0.000 | 1.533 | 0.000 |
| ENSMUSG00000044037 | ALS2 C-terminal like [Source:MGI Sy    | Als2cl    | 1.693 | 0.000 | 0.762 | 0.001 | 1.110 | 0.706 | 1.162 | 0.095 |
| ENSMUSG00000038740 | family with sequence similarity 125,   | Fam125b   | 0.710 | 0.000 | 1.230 | 0.002 | 1.366 | 0.000 | 0.639 | 0.000 |

|                    |                                        |             |       |       |       |       |       |       |       |       |
|--------------------|----------------------------------------|-------------|-------|-------|-------|-------|-------|-------|-------|-------|
| ENSMUSG00000021579 | leucine rich repeat containing 14B [   | Lrrc14b     | 1.574 | 0.000 | 1.317 | 0.002 | 1.294 | 0.000 | 1.602 | 0.000 |
| ENSMUSG00000021508 | chemokine (C-X-C motif) ligand 14 [    | Cxcl14      | 0.783 | 0.006 | 0.783 | 0.002 | 0.925 | 0.780 | 0.662 | 0.000 |
| ENSMUSG00000028255 | chloride channel calcium activated     | Clca3       | 0.652 | 0.000 | 1.146 | 0.002 | 0.651 | 0.000 | 1.147 | 0.007 |
| ENSMUSG00000021789 | surfactant associated protein A1 [So   | Sftpa1      | 0.362 | 0.000 | 1.268 | 0.003 | 0.831 | 0.270 | 0.552 | 0.000 |
| ENSMUSG00000024053 | elastin microfibril interfacier 2 [Sou | Emilin2     | 0.357 | 0.000 | 0.789 | 0.004 | 0.869 | 0.355 | 0.324 | 0.000 |
| ENSMUSG00000090307 | RIKEN cDNA 1700071M16 gene [So         |             | 0.649 | 0.000 | 1.214 | 0.005 | 1.310 | 0.026 | 0.601 | 0.000 |
| ENSMUSG00000030483 | cytochrome P450, family 2, subfami     | Cyp2b10     | 0.603 | 0.000 | 1.239 | 0.005 | 0.947 | 0.987 | 0.789 | 0.009 |
| ENSMUSG00000017754 | phospholipid transfer protein [Sou     | Pltp        | 0.579 | 0.000 | 0.779 | 0.006 | 0.739 | 0.000 | 0.611 | 0.000 |
| ENSMUSG00000024507 | hydroxysteroid (17-beta) dehydroge     | Hsd17b4     | 1.139 | 0.787 | 1.290 | 0.006 | 0.974 | 0.377 | 1.508 | 0.000 |
| ENSMUSG00000026358 | regulator of G-protein signaling 1 [S  | Rgs1        | 1.814 | 0.000 | 0.805 | 0.006 | 1.150 | 0.031 | 1.270 | 0.017 |
| ENSMUSG00000026417 | polymeric immunoglobulin receptor      | Pigr        | 0.771 | 0.011 | 1.186 | 0.009 | 0.622 | 0.000 | 1.472 | 0.000 |
| ENSMUSG00000014846 | tubulin polymerization-promoting p     | Tppp3       | 0.653 | 0.000 | 0.782 | 0.009 | 0.779 | 0.003 | 0.655 | 0.000 |
| ENSMUSG00000020658 | EFR3 homolog B (S. cerevisiae) [Sou    | Efr3b       | 1.441 | 0.000 | 1.338 | 0.012 | 1.271 | 0.203 | 1.518 | 0.000 |
| ENSMUSG00000033590 | myosin VC [Source:MGI Symbol;Acc       | Myo5c       | 0.665 | 0.000 | 1.176 | 0.016 | 0.882 | 0.681 | 0.886 | 0.727 |
| ENSMUSG00000092274 | nuclear paraspeckle assembly trans     | Neat1       | 1.559 | 0.000 | 0.817 | 0.017 | 1.162 | 0.659 | 1.096 | 0.438 |
| ENSMUSG00000031075 | anoctamin 1, calcium activated chlo    | Ano1        | 0.660 | 0.000 | 1.238 | 0.017 | 0.955 | 0.984 | 0.855 | 0.202 |
| ENSMUSG00000029822 | oxysterol binding protein-like 3 [Sou  | Osbp13      | 1.551 | 0.000 | 1.243 | 0.018 | 1.429 | 0.000 | 1.349 | 0.000 |
| ENSMUSG00000028480 | GLI pathogenesis-related 2 [Source:    | Glipr2      | 0.721 | 0.000 | 0.809 | 0.021 | 0.663 | 0.000 | 0.879 | 0.240 |
| ENSMUSG00000041921 | methionyl aminopeptidase type 1D       | Metap1d     | 1.502 | 0.000 | 0.810 | 0.023 | 1.186 | 0.212 | 1.026 | 0.923 |
| ENSMUSG00000026576 | ATPase, Na+/K+ transporting, beta 1    | Atp1b1      | 0.581 | 0.000 | 1.214 | 0.025 | 0.828 | 0.232 | 0.852 | 0.149 |
| ENSMUSG00000033295 | protein tyrosine phosphatase, recep    | Ptprf       | 0.575 | 0.000 | 1.212 | 0.027 | 0.869 | 0.639 | 0.802 | 0.009 |
| ENSMUSG00000085882 | RIKEN cDNA 2610507I01 gene [Sou        | 610507I01Ri | 3.204 | 0.000 | 0.793 | 0.032 | 1.796 | 0.000 | 1.414 | 0.000 |
| ENSMUSG00000038060 | deleted in lung and esophageal canc    | Dlec1       | 0.864 | 0.110 | 0.819 | 0.035 | 1.116 | 0.734 | 0.634 | 0.000 |
| ENSMUSG00000023959 | chloride intracellular channel 5 [Sou  | Clic5       | 0.432 | 0.000 | 1.181 | 0.042 | 0.853 | 0.561 | 0.599 | 0.000 |
| ENSMUSG00000037095 | leucine-rich alpha-2-glycoprotein 1    | Lrg1        | 0.476 | 0.000 | 1.116 | 0.043 | 0.814 | 0.125 | 0.653 | 0.000 |
| ENSMUSG00000049130 | complement component 5a recepto        | C5ar1       | 0.665 | 0.000 | 0.823 | 0.045 | 0.937 | 0.806 | 0.584 | 0.000 |
| ENSMUSG00000062148 | eosinophil-associated, ribonuclease    | Ear6        | 1.201 | 0.152 | 1.215 | 0.046 | 0.953 | 0.702 | 1.530 | 0.000 |
| ENSMUSG00000032842 | ATP-binding cassette, sub-family C (   | Abcc10      | 0.761 | 0.001 | 0.849 | 0.054 | 0.983 | 0.989 | 0.657 | 0.000 |
| ENSMUSG00000021573 | tubulin polymerization promoting p     | Tppp        | 0.562 | 0.000 | 1.186 | 0.055 | 0.896 | 0.576 | 0.744 | 0.000 |
| ENSMUSG00000087263 | predicted gene 15726 [Source:MGI       | Gm15726     | 0.575 | 0.000 | 0.870 | 0.060 | 1.167 | 0.447 | 0.429 | 0.000 |
| ENSMUSG00000054932 | alpha fetoprotein [Source:MGI Sym      | Afp         | 1.468 | 0.000 | 1.221 | 0.067 | 1.172 | 0.365 | 1.529 | 0.000 |
| ENSMUSG00000030159 | C-type lectin domain family 1, mem     | Clec1b      | 1.685 | 0.000 | 0.841 | 0.069 | 0.831 | 0.026 | 1.705 | 0.000 |
| ENSMUSG00000030739 | myosin, heavy polypeptide 14 [Sou      | Myh14       | 0.507 | 0.000 | 1.180 | 0.075 | 0.865 | 0.466 | 0.692 | 0.000 |
| ENSMUSG00000093077 | microRNA 5105 [Source:MGI Symbo        | Mir5105     | 0.628 | 0.000 | 0.745 | 0.075 | 0.568 | 0.000 | 0.824 | 0.423 |

|                    |                                       |          |       |       |       |       |       |       |       |       |
|--------------------|---------------------------------------|----------|-------|-------|-------|-------|-------|-------|-------|-------|
| ENSMUSG00000018849 | WW, C2 and coiled-coil domain con     | Wwc1     | 0.635 | 0.000 | 1.193 | 0.079 | 0.835 | 0.374 | 0.906 | 0.481 |
| ENSMUSG00000062515 | fatty acid binding protein 4, adipocy | Fabp4    | 1.511 | 0.000 | 0.830 | 0.084 | 1.674 | 0.000 | 0.750 | 0.001 |
| ENSMUSG00000022097 | surfactant associated protein C [Sou  | Sftpc    | 0.297 | 0.000 | 1.219 | 0.087 | 0.934 | 0.780 | 0.387 | 0.000 |
| ENSMUSG00000050370 | cholesterol 25-hydroxylase [Source:   | Ch25h    | 1.321 | 0.000 | 1.192 | 0.088 | 0.865 | 0.123 | 1.822 | 0.000 |
| ENSMUSG00000032216 | neural precursor cell expressed, dev  | Nedd4    | 0.639 | 0.000 | 1.139 | 0.100 | 0.835 | 0.303 | 0.872 | 0.456 |
| ENSMUSG00000023951 | vascular endothelial growth factor A  | Vegfa    | 0.528 | 0.000 | 1.179 | 0.109 | 0.855 | 0.396 | 0.729 | 0.000 |
| ENSMUSG00000036523 | gene regulated by estrogen in breas   | Greb1    | 2.162 | 0.000 | 0.835 | 0.120 | 1.699 | 0.000 | 1.062 | 0.278 |
| ENSMUSG00000056370 | surfactant associated protein B [Sou  | Sftpb    | 0.356 | 0.000 | 1.149 | 0.132 | 0.831 | 0.239 | 0.492 | 0.000 |
| ENSMUSG00000041247 | lysosomal-associated membrane pr      | Lamp3    | 0.592 | 0.000 | 1.157 | 0.138 | 0.820 | 0.282 | 0.835 | 0.033 |
| ENSMUSG00000022797 | transferrin receptor [Source:MGI Sy   | Tfrc     | 1.655 | 0.000 | 1.188 | 0.147 | 1.290 | 0.001 | 1.524 | 0.000 |
| ENSMUSG00000024462 | gamma-aminobutyric acid (GABA) B      | Gabbr1   | 1.019 | 0.904 | 0.869 | 0.158 | 1.484 | 0.000 | 0.596 | 0.000 |
| ENSMUSG00000036896 | complement component 1, q subco       | C1qc     | 0.672 | 0.000 | 0.846 | 0.158 | 0.663 | 0.000 | 0.857 | 0.148 |
| ENSMUSG00000058624 | guanine deaminase [Source:MGI Sy      | Gda      | 0.659 | 0.000 | 1.153 | 0.160 | 0.979 | 0.953 | 0.776 | 0.001 |
| ENSMUSG00000028195 | cysteine rich protein 61 [Source:MG   | Cyr61    | 0.602 | 0.000 | 1.153 | 0.172 | 0.814 | 0.167 | 0.852 | 0.115 |
| ENSMUSG00000036887 | complement component 1, q subco       | C1qa     | 0.684 | 0.000 | 0.820 | 0.174 | 0.597 | 0.000 | 0.939 | 0.923 |
| ENSMUSG00000024479 | mal, T cell differentiation protein 2 | Mal2     | 0.616 | 0.000 | 1.148 | 0.186 | 0.836 | 0.386 | 0.845 | 0.064 |
| ENSMUSG00000021182 | coiled-coil domain containing 88C [S  | Ccdc88c  | 1.087 | 0.907 | 1.141 | 0.195 | 1.507 | 0.000 | 0.823 | 0.061 |
| ENSMUSG00000029570 | LFNG O-fucosylpeptide 3-beta-N-ac     | Lfng     | 0.638 | 0.000 | 0.859 | 0.198 | 0.747 | 0.000 | 0.733 | 0.000 |
| ENSMUSG00000049608 | G protein-coupled receptor 55 [Sou    | Gpr55    | 1.529 | 0.000 | 1.156 | 0.217 | 1.587 | 0.000 | 1.114 | 0.061 |
| ENSMUSG00000062006 | ribosomal protein L34 [Source:MGI     | Rpl34    | 0.637 | 0.005 | 0.816 | 0.226 | 1.398 | 0.000 | 0.372 | 0.000 |
| ENSMUSG00000022037 | clusterin [Source:MGI Symbol;Acc:M    | Clu      | 0.387 | 0.000 | 1.023 | 0.236 | 0.673 | 0.000 | 0.589 | 0.000 |
| ENSMUSG00000014686 | carcinoembryonic antigen-related c    | Ceacam16 | 1.579 | 0.000 | 0.888 | 0.240 | 1.341 | 0.000 | 1.046 | 0.854 |
| ENSMUSG00000059463 | sperm associated antigen 11B [Sour    | Spag11b  | 1.625 | 0.000 | 1.145 | 0.249 | 1.191 | 0.071 | 1.562 | 0.000 |
| ENSMUSG00000016206 | histocompatibility 2, M region locus  | H2-M3    | 1.750 | 0.000 | 0.874 | 0.271 | 0.951 | 0.900 | 1.609 | 0.000 |
| ENSMUSG00000059606 | eosinophil-associated, ribonuclease   | Ear5     | 1.518 | 0.000 | 1.149 | 0.307 | 1.136 | 0.511 | 1.535 | 0.000 |
| ENSMUSG00000027070 | low density lipoprotein receptor-rel  | Lrp2     | 0.648 | 0.000 | 1.105 | 0.326 | 0.838 | 0.351 | 0.854 | 0.355 |
| ENSMUSG00000092267 | predicted gene 20417 [Source:MGI      | Gm20417  | 1.511 | 0.000 | 0.898 | 0.328 | 1.831 | 0.000 | 0.741 | 0.000 |
| ENSMUSG00000079491 | histocompatibility 2, T region locus  | H2-T10   | 0.462 | 0.000 | 0.906 | 0.334 | 0.931 | 0.853 | 0.449 | 0.000 |
| ENSMUSG00000025355 | matrix metallopeptidase 19 [Source    | Mmp19    | 0.567 | 0.000 | 1.117 | 0.352 | 0.914 | 0.365 | 0.693 | 0.000 |
| ENSMUSG00000085299 |                                       |          | 1.927 | 0.000 | 0.866 | 0.355 | 1.054 | 0.963 | 1.584 | 0.000 |
| ENSMUSG00000020592 | syndecan 1 [Source:MGI Symbol;Ac      | Sdc1     | 0.634 | 0.000 | 1.108 | 0.362 | 0.883 | 0.736 | 0.796 | 0.006 |
| ENSMUSG00000032420 | 5' nucleotidase, ecto [Source:MGI S   | Nt5e     | 0.630 | 0.000 | 0.911 | 0.384 | 0.853 | 0.052 | 0.673 | 0.000 |
| ENSMUSG00000029188 | solute carrier family 34 (sodium pho  | Slc34a2  | 0.657 | 0.000 | 1.113 | 0.396 | 0.876 | 0.800 | 0.835 | 0.039 |
| ENSMUSG00000090231 | complement factor B [Source:MGI S     | Cfb      | 1.536 | 0.000 | 1.113 | 0.405 | 1.235 | 0.060 | 1.384 | 0.000 |



|                    |                                        |         |       |       |       |       |       |       |       |       |
|--------------------|----------------------------------------|---------|-------|-------|-------|-------|-------|-------|-------|-------|
| ENSMUSG00000041548 | heat shock protein 8 [Source:MGI S     | Hspb8   | 0.551 | 0.000 | 1.090 | 0.412 | 0.808 | 0.102 | 0.745 | 0.000 |
| ENSMUSG00000029192 | TBC1 domain family, member 14 [S       | Tbc1d14 | 0.588 | 0.000 | 1.097 | 0.415 | 0.787 | 0.000 | 0.820 | 0.007 |
| ENSMUSG00000042349 | inhibitor of kappaB kinase epsilon [S  | Ikbke   | 1.424 | 0.000 | 1.146 | 0.420 | 1.561 | 0.000 | 1.045 | 0.846 |
| ENSMUSG00000092341 | metastasis associated lung adenoca     | Malat1  | 1.575 | 0.000 | 0.916 | 0.424 | 2.180 | 0.000 | 0.662 | 0.000 |
| ENSMUSG00000092511 | predicted gene 20547 [Source:MGI       | Gm20547 | 1.543 | 0.000 | 1.106 | 0.447 | 1.226 | 0.078 | 1.392 | 0.000 |
| ENSMUSG00000022661 | CD200 antigen [Source:MGI Symbol       | Cd200   | 1.637 | 0.000 | 1.102 | 0.452 | 1.206 | 0.087 | 1.496 | 0.000 |
| ENSMUSG00000067212 | histocompatibility 2, T region locus   | H2-T23  | 1.952 | 0.000 | 1.103 | 0.462 | 0.984 | 0.979 | 2.187 | 0.000 |
| ENSMUSG00000015478 | ring finger protein 5 [Source:MGI Sy   | Rnf5    | 0.603 | 0.000 | 1.077 | 0.467 | 1.007 | 1.000 | 0.645 | 0.000 |
| ENSMUSG00000039953 | calyntenin 1 [Source:MGI Symbol;A      | Clstn1  | 1.277 | 0.000 | 1.121 | 0.494 | 0.937 | 0.762 | 1.527 | 0.000 |
| ENSMUSG00000026380 | transcription factor CP2-like 1 [Sour  | Tfcp2l1 | 0.659 | 0.000 | 1.073 | 0.513 | 0.942 | 0.943 | 0.751 | 0.001 |
| ENSMUSG00000023043 | keratin 18 [Source:MGI Symbol;Acc:     | Krt18   | 0.555 | 0.000 | 1.064 | 0.517 | 0.815 | 0.250 | 0.725 | 0.000 |
| ENSMUSG00000031089 | solute carrier family 6 (neurotransm   | Slc6a14 | 0.627 | 0.000 | 1.076 | 0.540 | 0.838 | 0.394 | 0.804 | 0.014 |
| ENSMUSG00000059325 | HOP homeobox [Source:MGI Symbo         | Hopx    | 0.633 | 0.000 | 1.086 | 0.544 | 0.937 | 0.889 | 0.734 | 0.000 |
| ENSMUSG00000018340 | annexin A6 [Source:MGI Symbol;Ac       | Anxa6   | 0.501 | 0.000 | 1.076 | 0.565 | 0.769 | 0.017 | 0.702 | 0.000 |
| ENSMUSG00000029552 | testis derived transcript [Source:MG   | Tes     | 0.659 | 0.000 | 1.077 | 0.566 | 0.695 | 0.000 | 1.021 | 0.983 |
| ENSMUSG00000059089 | Fc receptor, IgG, low affinity IV [Sou | Fcgr4   | 0.596 | 0.000 | 1.076 | 0.585 | 0.835 | 0.093 | 0.768 | 0.000 |
| ENSMUSG00000053113 | suppressor of cytokine signaling 3 [S  | Socs3   | 0.644 | 0.000 | 0.940 | 0.585 | 0.709 | 0.000 | 0.854 | 0.048 |
| ENSMUSG00000031502 | collagen, type IV, alpha 1 [Source:M   | Col4a1  | 0.566 | 0.000 | 1.064 | 0.585 | 0.884 | 0.720 | 0.682 | 0.000 |
| ENSMUSG00000086695 | predicted gene 15247 [Source:MGI       | Gm15247 | 0.738 | 0.001 | 0.933 | 0.585 | 1.117 | 0.772 | 0.616 | 0.000 |
| ENSMUSG00000016283 | histocompatibility 2, M region locus   | H2-M2   | 1.742 | 0.000 | 0.915 | 0.587 | 0.995 | 1.000 | 1.602 | 0.000 |
| ENSMUSG00000049382 | keratin 8 [Source:MGI Symbol;Acc:      | Krt8    | 0.622 | 0.000 | 1.074 | 0.592 | 0.868 | 0.609 | 0.768 | 0.003 |
| ENSMUSG00000070473 | claudin 3 [Source:MGI Symbol;Acc:      | Cldn3   | 0.598 | 0.000 | 1.089 | 0.594 | 0.854 | 0.429 | 0.762 | 0.002 |
| ENSMUSG00000091549 | predicted gene 6548 [Source:MGI S      | Gm6548  | 1.711 | 0.000 | 0.906 | 0.601 | 0.986 | 0.987 | 1.572 | 0.000 |
| ENSMUSG00000046318 | collagen and calcium binding EGF do    | Ccbe1   | 1.669 | 0.000 | 0.946 | 0.613 | 1.202 | 0.082 | 1.314 | 0.009 |
| ENSMUSG00000035202 | leucyl-tRNA synthetase, mitochondr     | Lars2   | 0.567 | 0.000 | 1.039 | 0.633 | 0.685 | 0.000 | 0.860 | 0.132 |
| ENSMUSG00000026479 | laminin, gamma 2 [Source:MGI Sym       | Lamc2   | 0.474 | 0.000 | 0.956 | 0.646 | 0.799 | 0.084 | 0.567 | 0.000 |
| ENSMUSG00000030516 | tight junction protein 1 [Source:MG    | Tjp1    | 0.653 | 0.000 | 1.066 | 0.654 | 0.852 | 0.438 | 0.818 | 0.026 |
| ENSMUSG00000006445 | Eph receptor A2 [Source:MGI Symb       | Epha2   | 0.550 | 0.000 | 0.935 | 0.657 | 0.779 | 0.035 | 0.661 | 0.000 |
| ENSMUSG00000047821 | tripartite motif-containing 16 [Sourc  | Trim16  | 1.552 | 0.000 | 0.941 | 0.674 | 1.078 | 0.826 | 1.355 | 0.000 |
| ENSMUSG00000089672 | glycoprotein 49 A [Source:MGI Sym      | Gp49a   | 1.544 | 0.000 | 0.950 | 0.675 | 1.120 | 0.590 | 1.308 | 0.000 |
| ENSMUSG00000024026 | glyoxalase 1 [Source:MGI Symbol;A      | Glo1    | 0.524 | 0.000 | 1.060 | 0.690 | 0.975 | 0.991 | 0.570 | 0.000 |
| ENSMUSG00000032911 | chondroitin sulfate proteoglycan 4 [   | Cspg4   | 0.367 | 0.000 | 0.924 | 0.694 | 0.815 | 0.140 | 0.416 | 0.000 |
| ENSMUSG00000028173 | wntless homolog (Drosophila) [Sour     | Wls     | 0.648 | 0.000 | 0.940 | 0.696 | 0.846 | 0.042 | 0.720 | 0.000 |
| ENSMUSG00000031503 | collagen, type IV, alpha 2 [Source:M   | Col4a2  | 0.641 | 0.000 | 0.956 | 0.712 | 0.864 | 0.391 | 0.709 | 0.000 |

|                    |                                         |             |       |       |       |       |       |       |       |       |
|--------------------|-----------------------------------------|-------------|-------|-------|-------|-------|-------|-------|-------|-------|
| ENSMUSG00000023036 | protocadherin gamma subfamily A,        | Pcdhga3     | 0.648 | 0.000 | 0.940 | 0.713 | 0.871 | 0.247 | 0.699 | 0.000 |
| ENSMUSG00000092395 | predicted gene 20463 [Source:MGI        | Gm20463     | 0.638 | 0.000 | 1.030 | 0.713 | 0.928 | 0.898 | 0.708 | 0.000 |
| ENSMUSG00000032473 | claudin 18 [Source:MGI Symbol;Acc       | Cldn18      | 0.412 | 0.000 | 1.074 | 0.722 | 0.822 | 0.225 | 0.538 | 0.000 |
| ENSMUSG00000039457 | periplakin [Source:MGI Symbol;Acc:      | Ppl         | 0.665 | 0.000 | 1.045 | 0.727 | 0.889 | 0.694 | 0.781 | 0.003 |
| ENSMUSG00000025504 | EPS8-like 2 [Source:MGI Symbol;Acc      | Eps8l2      | 0.656 | 0.000 | 1.056 | 0.737 | 0.854 | 0.483 | 0.812 | 0.022 |
| ENSMUSG00000040152 | thrombospondin 1 [Source:MGI Sym        | Thbs1       | 0.573 | 0.000 | 1.088 | 0.742 | 0.762 | 0.009 | 0.819 | 0.003 |
| ENSMUSG00000054951 | RIKEN cDNA 9130008F23 gene [Sou         | 130008F23Ri | 1.592 | 0.000 | 0.932 | 0.756 | 0.975 | 1.000 | 1.522 | 0.000 |
| ENSMUSG00000006360 | cysteine-rich protein 1 (intestinal) [S | Crip1       | 0.595 | 0.000 | 1.044 | 0.768 | 0.589 | 0.000 | 1.054 | 0.971 |
| ENSMUSG00000023039 | keratin 7 [Source:MGI Symbol;Acc:       | Krt7        | 0.506 | 0.000 | 1.055 | 0.773 | 0.777 | 0.068 | 0.687 | 0.000 |
| ENSMUSG00000032076 | cell adhesion molecule 1 [Source:M      | Cadm1       | 0.657 | 0.000 | 1.054 | 0.774 | 0.791 | 0.078 | 0.876 | 0.123 |
| ENSMUSG00000092283 | predicted gene 20412 [Source:MGI        | Gm20412     | 0.655 | 0.000 | 1.041 | 0.799 | 0.900 | 0.364 | 0.758 | 0.001 |
| ENSMUSG00000086324 | predicted gene 15564 [Source:MGI        | Gm15564     | 0.578 | 0.000 | 1.021 | 0.821 | 0.676 | 0.000 | 0.873 | 0.125 |
| ENSMUSG00000024059 | CAP-GLY domain containing linker p      | Clip4       | 0.615 | 0.000 | 1.040 | 0.822 | 0.878 | 0.606 | 0.728 | 0.000 |
| ENSMUSG00000028024 | glutamyl aminopeptidase [Source:M       | Enpep       | 0.600 | 0.000 | 1.033 | 0.829 | 0.845 | 0.442 | 0.734 | 0.000 |
| ENSMUSG00000027030 | serine/threonine kinase 39 [Source:     | Stk39       | 0.757 | 0.000 | 0.955 | 0.830 | 1.090 | 0.676 | 0.663 | 0.000 |
| ENSMUSG00000023979 | guanylate cyclase activator 1B [Sour    | Guca1b      | 1.452 | 0.000 | 1.048 | 0.842 | 0.975 | 1.000 | 1.560 | 0.000 |
| ENSMUSG00000050953 | gap junction protein, alpha 1 [Sourc    | Gja1        | 0.569 | 0.000 | 0.966 | 0.855 | 0.807 | 0.119 | 0.681 | 0.000 |
| ENSMUSG00000015647 | laminin, alpha 5 [Source:MGI Symbo      | Lama5       | 0.628 | 0.000 | 0.966 | 0.858 | 0.871 | 0.449 | 0.697 | 0.000 |
| ENSMUSG00000024486 | heparin-binding EGF-like growth fac     | Hbegf       | 0.631 | 0.000 | 0.963 | 0.863 | 0.913 | 0.836 | 0.666 | 0.000 |
| ENSMUSG00000018593 | secreted acidic cysteine rich glycopr   | Sparc       | 0.535 | 0.000 | 1.001 | 0.864 | 1.003 | 0.993 | 0.534 | 0.000 |
| ENSMUSG00000057530 | endothelin converting enzyme 1 [So      | Ece1        | 0.517 | 0.000 | 0.975 | 0.874 | 0.715 | 0.000 | 0.705 | 0.000 |
| ENSMUSG00000022505 | epithelial membrane protein 2 [Sou      | Emp2        | 0.455 | 0.000 | 1.037 | 0.875 | 0.865 | 0.542 | 0.546 | 0.000 |
| ENSMUSG00000022899 | solute carrier family 15 (H+/peptide    | Slc15a2     | 1.511 | 0.000 | 0.978 | 0.883 | 1.321 | 0.001 | 1.119 | 0.399 |
| ENSMUSG00000092254 | RIKEN cDNA A930015D03 gene [Sou         | 930015D03Ri | 0.645 | 0.000 | 1.027 | 0.896 | 0.996 | 1.000 | 0.666 | 0.000 |
| ENSMUSG00000036905 | complement component 1, q subco         | C1qb        | 0.636 | 0.000 | 0.982 | 0.896 | 0.675 | 0.000 | 0.926 | 0.904 |
| ENSMUSG00000060969 | Iroquois related homeobox 1 (Droso      | Irx1        | 0.652 | 0.000 | 1.034 | 0.905 | 0.867 | 0.736 | 0.777 | 0.002 |
| ENSMUSG00000001473 | tubulin, beta 6 class V [Source:MGI     | Tubb6       | 0.659 | 0.000 | 1.023 | 0.907 | 0.870 | 0.257 | 0.775 | 0.001 |
| ENSMUSG00000076258 |                                         | AC087541.1  | 0.622 | 0.000 | 0.952 | 0.915 | 0.658 | 0.000 | 0.900 | 0.117 |
| ENSMUSG00000035441 | myosin ID [Source:MGI Symbol;Acc:       | Myo1d       | 0.666 | 0.000 | 1.006 | 0.926 | 0.876 | 0.523 | 0.765 | 0.000 |
| ENSMUSG00000032280 | transducin-like enhancer of split 3,    | Tle3        | 0.683 | 0.000 | 1.008 | 0.926 | 1.039 | 0.924 | 0.662 | 0.000 |
| ENSMUSG00000021795 | surfactant associated protein D [Sou    | Sftpd       | 0.489 | 0.000 | 1.033 | 0.926 | 0.836 | 0.300 | 0.604 | 0.000 |
| ENSMUSG00000046711 | high mobility group AT-hook 1 [Sour     | Hmga1       | 2.151 | 0.000 | 1.017 | 0.928 | 1.141 | 0.238 | 1.916 | 0.000 |
| ENSMUSG00000026604 | protein tyrosine phosphatase, non-r     | Ptpn14      | 0.667 | 0.000 | 1.021 | 0.928 | 0.933 | 0.921 | 0.729 | 0.000 |
| ENSMUSG00000072812 | AHNAK nucleoprotein 2 [Source:MG        | Ahnak2      | 1.456 | 0.000 | 1.039 | 0.932 | 0.957 | 0.829 | 1.581 | 0.000 |

|                    |                                      |             |       |       |       |       |       |       |       |       |
|--------------------|--------------------------------------|-------------|-------|-------|-------|-------|-------|-------|-------|-------|
| ENSMUSG00000029375 | chemokine (C-X-C motif) ligand 15 [  | Cxcl15      | 0.597 | 0.000 | 0.994 | 0.934 | 0.821 | 0.139 | 0.722 | 0.000 |
| ENSMUSG00000089637 |                                      |             | 0.418 | 0.000 | 1.030 | 0.937 | 0.877 | 0.716 | 0.490 | 0.000 |
| ENSMUSG00000078249 | high mobility group AT-hook I, relat | Hmga1-rs1   | 0.418 | 0.000 | 1.030 | 0.937 | 0.877 | 0.716 | 0.490 | 0.000 |
| ENSMUSG00000051177 | phospholipase C, beta 1 [Source:MGI  | Plcb1       | 0.646 | 0.000 | 0.980 | 0.939 | 1.009 | 1.000 | 0.627 | 0.000 |
| ENSMUSG00000076441 | argininosuccinate synthetase 1 [Sou  | Ass1        | 1.389 | 0.000 | 0.999 | 0.950 | 0.847 | 0.336 | 1.638 | 0.000 |
| ENSMUSG00000075391 | predicted gene 13443 [Source:MGI     | Gm13443     | 0.642 | 0.000 | 0.987 | 0.952 | 0.928 | 0.889 | 0.683 | 0.000 |
| ENSMUSG00000033149 | pleckstrin homology-like domain, fa  | Phldb2      | 0.661 | 0.000 | 0.987 | 0.959 | 0.893 | 0.726 | 0.732 | 0.000 |
| ENSMUSG00000028128 | coagulation factor III [Source:MGI S | F3          | 0.629 | 0.000 | 1.021 | 0.961 | 0.798 | 0.080 | 0.804 | 0.009 |
| ENSMUSG00000037820 | transglutaminase 2, C polypeptide [  | Tgm2        | 0.660 | 0.000 | 0.987 | 0.966 | 0.906 | 0.451 | 0.720 | 0.000 |
| ENSMUSG00000056492 | G protein-coupled receptor 116 [So   | Gpr116      | 0.587 | 0.000 | 1.017 | 0.968 | 0.849 | 0.554 | 0.703 | 0.000 |
| ENSMUSG00000063458 | RIKEN cDNA 1700112E06 gene [Sou      | 700112E06Ri | 0.529 | 0.000 | 0.979 | 0.970 | 0.776 | 0.088 | 0.668 | 0.000 |
| ENSMUSG00000092984 | microRNA 5115 [Source:MGI Symbo      | Mir5115     | 0.656 | 0.000 | 0.986 | 0.990 | 0.661 | 0.000 | 0.979 | 0.938 |
| ENSMUSG00000028327 | RIKEN cDNA 1300002K09 gene [Sou      | 300002K09Ri | 1.838 | 0.000 | 1.005 | 0.994 | 1.136 | 0.432 | 1.625 | 0.000 |
| ENSMUSG00000029378 | amphiregulin [Source:MGI Symbol;A    | Areg        | 0.581 | 0.000 | 1.022 | 1.000 | 0.870 | 0.393 | 0.683 | 0.000 |
| ENSMUSG00000059040 | predicted gene 5506 [Source:MGI S    | Gm5506      | 1.874 | 0.000 | 1.040 | 1.000 | 0.973 | 1.000 | 2.002 | 0.000 |
| ENSMUSG00000046733 | G protein-coupled receptor, family   | Gprc5a      | 0.448 | 0.000 | 1.007 | 1.000 | 0.803 | 0.152 | 0.563 | 0.000 |
| ENSMUSG00000047090 | transmembrane protein 198b [Sour     | Tmem198b    | 0.645 | 0.000 | 0.996 | 1.000 | 0.852 | 0.081 | 0.754 | 0.000 |
| ENSMUSG00000049001 | neuron-derived neurotrophic factor   | Ndnf        | 0.442 | 0.000 | 1.000 | 1.000 | 0.772 | 0.075 | 0.572 | 0.000 |
| ENSMUSG00000032366 | tropomyosin 1, alpha [Source:MGI S   | Tpm1        | 0.643 | 0.000 | 1.010 | 1.000 | 0.862 | 0.351 | 0.754 | 0.000 |
| ENSMUSG00000033060 | LIM domain only 7 [Source:MGI Sym    | Lmo7        | 0.417 | 0.000 | 1.009 | 1.000 | 0.816 | 0.171 | 0.516 | 0.000 |

**Supplementary Table 2. Upstream regulators predicted to be activated in AM from RAGE null mice compared to wild-type (WT) mice.**

| <u>Upstream Regulator</u>                         | <u>Type</u>   | RAGE-CT / WT-CT |          | RAGE-CS / WT-CS |          |
|---------------------------------------------------|---------------|-----------------|----------|-----------------|----------|
|                                                   |               | z-score         | p-val    | z-score         | p-val    |
| Beta-estradiol                                    | Chemical      | 2.641           | 3.78E-20 | 0.717           | 1.06E-11 |
| Transforming growth factor beta 1                 | Growth factor | 3.312           | 3.85E-15 | -0.056          | 3.40E-11 |
| Endothelin 1                                      | Cytokine      | 3.040           | 4.88E-12 | ns              | ns       |
| Protein phosphatase 3 regulatory subunit B, alpha | Phosphatase   | 2.580           | 7.29E-10 | 1.970           | 8.05E-06 |
| Nitric oxide                                      | Chemical      | -2.613          | 5.80E-08 | -2.577          | 1.51E-07 |
| Zinc finger E-box binding homeobox 1              | TF            | -2.433          | 9.27E-07 | -2.00           | 6.66E-05 |
| Cytochrome P450 1a1                               | Enzyme        | -2.400          | 1.30E-06 | -2.183          | 1.77E-04 |
| Connective tissue growth factor                   | Growth factor | 2.623           | 1.68E-05 | ns              | 1.62E-02 |

Both control (CT) and cigarette smoke (CS) exposed genotype comparisons are shown. Table denotes description and type (transcription factor (TF), growth factor, cytokine etc.) of upstream regulator together with Fisher exact overlap p-value and activation Z-score as output from Ingenuity Pathway Analysis (IPA). The overlap p-value calls likely upstream regulators based on significant overlap between differentially expressed genes and known gene targets. The activation Z-score infers activation or inhibition of upstream regulators based on the direction of fold change of differentially expressed target genes. Comparison values with z-score statistics > 2 or < -2 are highlighted.

**Supplementary Table 3. Predicted Upstream Regulators**

| <b>Growth factors</b>                                    | <i>Symbol</i>        | RefSeq ID     | Prediction | RAGE null vs C57 WT control |                 |
|----------------------------------------------------------|----------------------|---------------|------------|-----------------------------|-----------------|
|                                                          |                      |               |            | 7-Day <sup>1</sup><br>Fold  | 4-Month<br>Fold |
| <u>Transforming growth factor beta 1 (TGFB1)</u>         |                      |               |            |                             |                 |
| Chondroitin sulfate proteoglycan 4                       | <i>Cspg4</i>         | NM_139001     | Activated  | <b>2.7</b>                  | <b>2.8</b>      |
| Clusterin                                                | <i>Clu</i>           | NM_013492     | Activated  | <b>2.6</b>                  | <b>2.2</b>      |
| Lammin, gamma 2                                          | <i>Lamc2</i>         | NM_008485     | Activated  | <b>2.1</b>                  | <b>1.8</b>      |
| Keratin 7                                                | <i>Krt7</i>          | NM_033073     | Activated  | <b>2.0</b>                  | <b>1.5</b>      |
| Vascular endothelial growth factor A                     | <i>Vegfa</i>         | NM_001025250* | Activated  | <b>1.9</b>                  | <b>1.5</b>      |
| Secreted acidic cysteine rich glycoprotein               | <i>Sparc</i>         | NM_009242*    | Activated  | <b>1.9</b>                  | <b>1.6</b>      |
| Keratin 18                                               | <i>Krt18</i>         | NM_010664     | Activated  | <b>1.8</b>                  | <b>1.6</b>      |
| Tissue inhibitor of metalloproteinase 3                  | <i>Timp3</i>         | NM_011595     | Activated  | <b>1.8</b>                  | <b>1.6</b>      |
| Collage, type IV, alpha 1                                | <i>Col4a1</i>        | NM_009931     | Activated  | <b>1.8</b>                  | 1.2             |
| Gap junction protein, alpha 1                            | <i>Gja1</i>          | NM_010288     | Activated  | <b>1.8</b>                  | <b>1.5</b>      |
| Thrombospondin 1                                         | <i>Thbs1</i>         | NM_011580*    | Activated  | <b>1.7</b>                  | <b>1.9</b>      |
| Amphiregulin                                             | <i>Areg</i>          | NM_009704     | Activated  | <b>1.7</b>                  | ns              |
| Fc receptor, IgG, low affinity IV                        | <i>Fcgr4</i>         | NM_144559     | Activated  | <b>1.7</b>                  | 1.4             |
| Cysteine rich protein 61                                 | <i>Cyr61</i>         | NM_010516     | Activated  | <b>1.7</b>                  | 1.4             |
| Coagulation factor III                                   | <i>F3</i>            | NM_010171     | Activated  | <b>1.6</b>                  | <b>1.5</b>      |
| 5' nucleotidase, ecto                                    | <i>Nt5e</i>          | NM_011851     | Activated  | <b>1.6</b>                  | <b>1.9</b>      |
| Heparin-binding EGF-like growth factor                   | <i>Hbegf</i>         | NM_010415     | Activated  | <b>1.6</b>                  | 1.4             |
| Syndecan 1                                               | <i>Sdc1</i>          | NM_011519     | Activated  | <b>1.6</b>                  | 1.4             |
| Complement component 1, q subcomponent, beta polypeptide | <i>C1qb</i>          | NM_009777     | Activated  | <b>1.6</b>                  | ns              |
| Fibronectin 1                                            | <i fn1<="" i=""></i> | NM_010233*    | Activated  | <b>1.6</b>                  | <b>1.8</b>      |
| Collage, type IV, alpha 2                                | <i>Col4a2</i>        | NM_009932     | Activated  | <b>1.6</b>                  | ns              |
| Tropomyosin 1                                            | <i>Tpm1</i>          | NM_024427*    | Activated  | <b>1.6</b>                  | ns              |
| Suppressor of cytokine signaling 3                       | <i>Socs3</i>         | NM_007707     | Activated  | <b>1.6</b>                  | <b>2.2</b>      |
| Heat shock protein 5                                     | <i>Hspa5</i>         | NM_001163434* | Activated  | <b>1.6</b>                  | <b>1.5</b>      |
| Transglutaminase 2, C polypeptide                        | <i>Tgm2</i>          | NM_009373     | Activated  | <b>1.5</b>                  | ns              |
| Complement component 5a receptor 1                       | <i>C5ar1</i>         | NM_007577*    | Activated  | <b>1.5</b>                  | <b>1.5</b>      |
| Heat shock protein 1A                                    | <i>Hspa1a</i>        | NM_010479     | Activated  | <b>-1.9</b>                 | -1.4            |
| Chemokine (C-X-C motif) ligand 3                         | <i>Cxcl3</i>         | NM_203320     | Activated  | <b>-1.6</b>                 | -1.4            |
| Aryl-hydrocarbon receptor                                | <i>Ahr</i>           | NM_013464*    | Activated  | ns                          | <b>1.7</b>      |
| Chemokine (C-C motif) receptor 1                         | <i>Ccr1</i>          | NM_009912     | Activated  | 1.4                         | <b>1.8</b>      |

|                                                       |                |               |           |            |             |
|-------------------------------------------------------|----------------|---------------|-----------|------------|-------------|
| CD14 antigen                                          | <i>Cd14</i>    | NM_009841     | Activated | 1.2        | <b>4.0</b>  |
| Carboxylesterase 2C                                   | <i>Ces2c</i>   | NM_145603     | Activated | -1.2       | <b>-1.7</b> |
| Collagen, type VI, alpha 3                            | <i>Col6a3</i>  | NM_001243008* | Activated | ns         | <b>1.6</b>  |
| Disabled 2                                            | <i>Dab2</i>    | NM_023118*    | Activated | 1.4        | <b>1.9</b>  |
| Death associated protein kinase 1                     | <i>Dapk1</i>   | NM_029653*    | Activated | ns         | <b>1.6</b>  |
| DNA methyltransferase (cytosine-5) 1                  | <i>Dnmt1</i>   | NM_001199431* | Activated | -1.2       | <b>-1.6</b> |
| Elastin microfibril interfacier 1                     | <i>Emilin1</i> | NM_133918     | Activated | 1.4        | <b>2.0</b>  |
| Epithelial cell adhesion molecule                     | <i>Epcam</i>   | NM_008532     | Activated | <b>2.1</b> | <b>1.8</b>  |
| FBJ osteosarcoma oncogene                             | <i>Fos</i>     | NM_010234     | Activated | ns         | <b>1.7</b>  |
| Insulin-like growth factor 1                          | <i>Igf1</i>    | NM_010512*    | Activated | -1.4       | <b>-2.5</b> |
| Interleukin 4 receptor, alpha                         | <i>Il4ra</i>   | NM_001008700  | Activated | 1.4        | <b>1.8</b>  |
| Interleukin 6 receptor, alpha                         | <i>Il6ra</i>   | NM_010559     | Activated | 1.4        | <b>1.6</b>  |
| Jun B proto-oncogene                                  | <i>Junb</i>    | NM_008416     | Activated | ns         | <b>1.5</b>  |
| Killer cell lectin-like receptor subfamily B member 1 | <i>Klrb1</i>   | NM_001099918* | Activated | -1.4       | <b>-2.2</b> |
| Lipoprotein lipase                                    | <i>Lpl</i>     | NM_008509     | Activated | ns         | <b>-1.9</b> |
| Minichromosome maintenance deficient 2 mitotin        | <i>Mcm2</i>    | NM_008564     | Activated | ns         | <b>-1.6</b> |
| Purinergic receptor P2Y, G-protein coupled,14         | <i>P2ry14</i>  | NM_133200*    | Activated | 1.3        | <b>1.6</b>  |
| Plasminogen activator, urokinase receptor             | <i>Plaur</i>   | NM_011113     | Activated | ns         | <b>1.6</b>  |
| Runt related transcription factor 1                   | <i>Runx1</i>   | NM_001111021* | Activated | ns         | <b>1.6</b>  |
| Vitamin D receptor                                    | <i>Vdr</i>     | NM_009504     | Activated | 1.3        | <b>2.4</b>  |
| X-box binding protein 1                               | <i>Xbp1</i>    | NM_013842*    | Activated | 1.2        | <b>1.7</b>  |

#### Endothelin 1 (EDN1)

|                                           |                      |               |           |            |            |
|-------------------------------------------|----------------------|---------------|-----------|------------|------------|
| Vascular endothelial growth factor A      | <i>Vegfa</i>         | NM_001025250* | Activated | <b>1.9</b> | <b>1.5</b> |
| Tissue inhibitor of metalloproteinase 3   | <i>Timp3</i>         | NM_011595     | Activated | <b>1.8</b> | <b>1.6</b> |
| Thrombospondin 1                          | <i>Thbs1</i>         | NM_011580*    | Activated | <b>1.7</b> | <b>1.9</b> |
| Transglutaminase 2, C polypeptide         | <i>Tgm2</i>          | NM_009373     | Activated | <b>1.5</b> | ns         |
| Suppressor of cytokine signaling 3        | <i>Socs3</i>         | NM_007707     | Activated | <b>1.6</b> | <b>2.2</b> |
| Syndecan 1                                | <i>Sdc1</i>          | NM_011519     | Activated | <b>1.6</b> | 1.4        |
| Gap junction protein, alpha 1             | <i>Gja1</i>          | NM_010288     | Activated | <b>1.8</b> | <b>1.5</b> |
| Fibronectin 1                             | <i fn1<="" i=""></i> | NM_010233*    | Activated | <b>1.6</b> | <b>1.8</b> |
| Collage, type IV, alpha 1                 | <i>Col4a1</i>        | NM_009931     | Activated | <b>1.8</b> | 1.2        |
| Plasminogen activator, urokinase receptor | <i>Plaur</i>         | NM_011113     | Activated | ns         | <b>1.6</b> |
| Leptin receptor                           | <i>Lepr</i>          | NM_146146*    | Activated | <b>1.5</b> | <b>2.1</b> |

|                           |             |           |           |    |     |
|---------------------------|-------------|-----------|-----------|----|-----|
| Jun B proto-oncogene      | <i>Junb</i> | NM_008416 | Activated | ns | 1.5 |
| FBJ osteosarcoma oncogene | <i>Fos</i>  | NM_010234 | Activated | ns | 1.7 |

Connective tissue growth factor (CTGF)

|                                            |                |               |           |      |      |
|--------------------------------------------|----------------|---------------|-----------|------|------|
| Vascular endothelial growth factor A       | <i>Vegfa</i>   | NM_001025250* | Activated | 1.9  | 1.5  |
| Tissue inhibitor of metalloproteinase 3    | <i>Timp3</i>   | NM_011595     | Activated | 1.8  | 1.6  |
| Tropomyosin 1                              | <i>Tpm1</i>    | NM_024427*    | Activated | 1.6  | ns   |
| Secreted acidic cysteine rich glycoprotein | <i>Sparc</i>   | NM_009242*    | Activated | 1.9  | 1.6  |
| Fibronectin 1                              | <i>Fn1</i>     | NM_010233*    | Activated | 1.6  | 1.8  |
| Collage, type IV, alpha 2                  | <i>Col4a2</i>  | NM_009932     | Activated | 1.6  | ns   |
| Insulin-like growth factor 1               | <i>Igf1</i>    | NM_010512*    | Activated | -1.4 | -2.5 |
| Elastin microfibril interfacier 1          | <i>Emilin1</i> | NM_133918     | Activated | 1.4  | 2.0  |

**1 - NOTES**

Red font = statistically significant (Fold  $\geq$  1.5 and FDR < 0.05)

ns = not significant (FDR > 0.05)

\* Gene has more than one isoform

**Supplementary Table 4. Predicted Upstream Regulators**

| <i>Transcription factors</i>                                          | <i>Symbol</i>   | RefSeq ID     | Prediction | 7-Day Fold <sup>1</sup> |             |             | 4-Month Fold |             |             |
|-----------------------------------------------------------------------|-----------------|---------------|------------|-------------------------|-------------|-------------|--------------|-------------|-------------|
|                                                                       |                 |               |            | C57                     | RAGE        | CS          | C57          | RAGE        | CS          |
| <u>Nuclear factor, erythroid derived 2, like 2 (NFE2L2, NRF2)</u>     |                 |               |            |                         |             |             |              |             |             |
| Solute carrier family 7, member 11                                    | <i>Slc7a11</i>  | NM_011990     | Activated  | <b>2.6</b>              | <b>2.8</b>  | <b>2.3</b>  | <b>2.1</b>   | -1.2        | <b>6.2</b>  |
| Cytochrome P450, family 2, subfamily a, polypeptide 5                 | <i>Cyp2a5</i>   | NM_007812     | Activated  | <b>2.1</b>              | 1.3         | 1.4         | ns           | -1.2        | ns          |
| Carbonyl reductase 2                                                  | <i>Cbr2</i>     | NM_007621     | Activated  | <b>2</b>                | 1.2         | 1.2         | ns           | -1.4        | ns          |
| Heme oxygenase 1                                                      | <i>Hmox1</i>    | NM_010442     | Activated  | <b>2</b>                | <b>1.6</b>  | <b>2.6</b>  | -1.3         | -2.3        | <b>3.9</b>  |
| Sequestosome 1                                                        | <i>Sqstm1</i>   | NM_011018*    | Activated  | <b>2</b>                | ns          | <b>1.6</b>  | ns           | ns          | <b>1.6</b>  |
| Heat shock protein 90, alpha, class A member 1                        | <i>Hsp90aa1</i> | NM_010480     | Activated  | <b>1.9</b>              | 1.3         | 1.3         | ns           | -1.2        | ns          |
| Sulfiredoxin 1 homolog                                                | <i>Srxn1</i>    | NM_029688     | Activated  | <b>1.8</b>              | <b>1.6</b>  | <b>1.9</b>  | ns           | ns          | <b>2.4</b>  |
| Cysteine and histidine-rich domain-containing, zinc binding protein 1 | <i>Chordc1</i>  | NM_025844     | Activated  | <b>1.7</b>              | ns          | 1.3         | ns           | -1.6        | ns          |
| Heat shock protein 90, alpha, class B member 1                        | <i>Hsp90ab1</i> | NM_008302     | Activated  | <b>1.7</b>              | 1.4         | ns          | 1.3          | ns          | ns          |
| Stress-induced phosphoprotein 1                                       | <i>Stip1</i>    | NM_016737     | Activated  | <b>1.7</b>              | ns          | ns          | ns           | -1.3        | ns          |
| Thioredoxin reductase 1                                               | <i>Txnrd1</i>   | NM_001042523* | Activated  | <b>1.7</b>              | <b>1.5</b>  | <b>1.6</b>  | 1.2          | ns          | <b>1.9</b>  |
| Aldehyde dehydrogenase family 1, subfamily A1                         | <i>Aldh1a1</i>  | NM_013467     | Activated  | <b>1.7</b>              | ns          | 1.4         | ns           | -1.2        | ns          |
| ATP-binding cassette, subfamily C, member 1                           | <i>Abcc1</i>    | NM_008576     | Activated  | <b>1.6</b>              | <b>1.6</b>  | <b>1.5</b>  | 1.2          | ns          | <b>2.2</b>  |
| Glutamate-cysteine ligase, modifier subunit                           | <i>Gclm</i>     | NM_008129     | Activated  | <b>1.6</b>              | <b>1.5</b>  | <b>1.7</b>  | ns           | -1.3        | <b>2.2</b>  |
| Glutathione S-transferase, alpha 3                                    | <i>Gsta3</i>    | NM_001077353* | Activated  | <b>1.6</b>              | 1.2         | 1.4         | 1.3          | -1.3        | <b>1.8</b>  |
| Heat shock protein 90, beta, member 1                                 | <i>Hsp90b1</i>  | NM_011631     | Activated  | <b>1.6</b>              | ns          | ns          | 1.2          | ns          | ns          |
| Protein disulfide isomerase associated 4                              | <i>Paia4</i>    | NM_009787     | Activated  | <b>1.6</b>              | ns          | ns          | ns           | -1.3        | ns          |
| Protein disulfide isomerase associated 6                              | <i>Paia6</i>    | NM_027959     | Activated  | <b>1.6</b>              | ns          | ns          | ns           | -1.2        | ns          |
| Aldo-keto reductase family 1, member B8                               | <i>Akr1b8</i>   | NM_008012     | Activated  | <b>1.5</b>              | ns          | <b>1.8</b>  | <b>1.6</b>   | 1.4         | <b>2</b>    |
| DnaJ (Hsp40) homolog, subfamily C, member 3                           | <i>Dnajc3</i>   | NM_008929     | Activated  | <b>1.5</b>              | ns          | ns          | ns           | -1.3        | ns          |
| Esterase D/formylglutathione hydrolase                                | <i>Esd</i>      | NM_001285423* | Activated  | <b>1.5</b>              | 1.3         | <b>1.6</b>  | 1.2          | ns          | <b>1.9</b>  |
| Glutathione S-transferase, mu 1                                       | <i>Gstm1</i>    | NM_010358     | Activated  | <b>1.5</b>              | 1.3         | <b>1.5</b>  | <b>2</b>     | <b>2.2</b>  | 1.3         |
| Peroxiredoxin 1                                                       | <i>Prdx1</i>    | NM_011034     | Activated  | <b>1.5</b>              | 1.3         | <b>1.6</b>  | ns           | ns          | <b>1.9</b>  |
| Carboxylesterase 1D                                                   | <i>Ces1D</i>    | NM_053200     | Activated  | <b>1.5</b>              | ns          | ns          | ns           | ns          | ns          |
| Epoxide hydrolase 1                                                   | <i>Ephx1</i>    | NM_010145     | Activated  | 1.4                     | ns          | <b>1.5</b>  | <b>1.8</b>   | 1.4         | <b>2.4</b>  |
| Metallothionein 1                                                     | <i>Mt1</i>      | NM_013602     | Activated  | 1.4                     | 1.3         | <b>1.7</b>  | ns           | 1.3         | 1.4         |
| NAD(P)H dehydrogenase, quinone 1                                      | <i>Nqo1</i>     | NM_008706     | Activated  | 1.4                     | 1.4         | <b>1.5</b>  | ns           | ns          | <b>2.1</b>  |
| Endothelial PAS domain protein 1                                      | <i>Epas1</i>    | NM_010137     | Activated  | 1.3                     | ns          | <b>2.1</b>  | <b>2.7</b>   | <b>1.8</b>  | <b>5.9</b>  |
| Fatty acid binding protein 1                                          | <i>Fabp1</i>    | NM_0179399    | Activated  | <b>-1.7</b>             | ns          | -1.3        | <b>-2</b>    | <b>-1.8</b> | -1.2        |
| Aminolevulinic acid synthase 2, erythroid                             | <i>Alas2</i>    | NM_009653*    | Activated  | <b>-2</b>               | <b>-1.5</b> | ns          | 1.2          | <b>-1.6</b> | 1.2         |
| Gamma-aminobutyric acid (GABA) B receptor 1                           | <i>Gabbr1</i>   | NM_019439     | Affected   | ns                      | 1.5         | <b>-1.7</b> | 1.2          | 1.3         | <b>-1.6</b> |
| Chemokine (C-X-C motif) ligand 2                                      | <i>Cxcl2</i>    | NM_009140     | Inhibited  | <b>1.7</b>              | <b>1.7</b>  | <b>2</b>    | -1.3         | -2.1        | <b>2.2</b>  |
| Tumor necrosis factor                                                 | <i>Tnf</i>      | NM_013693*    | Inhibited  | <b>1.6</b>              | 1.4         | <b>1.5</b>  | 1.3          | -1.3        | <b>2.1</b>  |
| Cathepsin K                                                           | <i>Ctsk</i>     | NM_007802     | Inhibited  | <b>1.5</b>              | ns          | <b>1.9</b>  | <b>1.6</b>   | <b>1.5</b>  | <b>1.6</b>  |
| Chemokine (C-X-C motif) ligand 1                                      | <i>Cxcl1</i>    | NM_008176     | Inhibited  | 1.4                     | ns          | <b>1.6</b>  | ns           | <b>-1.5</b> | 1.2         |
| Acid phosphatase 5, tartrate resistant                                | <i>Acp5</i>     | NM_001102405* | Inhibited  | <b>1.5</b>              | 1.3         | 1.2         | <b>2</b>     | <b>1.7</b>  | ns          |
| Cathepsin D                                                           | <i>Ctsd</i>     | NM_009983     | Activated  | 1.4                     | ns          | ns          | <b>1.6</b>   | <b>1.6</b>  | ns          |
| Malic enzyme 1, NADP(+)-dependent, cytosolic                          | <i>Me1</i>      | NM_008615     | Activated  | 1.4                     | 1.2         | 1.4         | <b>1.6</b>   | ns          | <b>2</b>    |



|                                                      |                |               |           |      |             |      |             |             |             |
|------------------------------------------------------|----------------|---------------|-----------|------|-------------|------|-------------|-------------|-------------|
| Catalase                                             | <i>Cat</i>     | NM_009804     | Activated | 1.3  | <b>1.6</b>  | 1.2  | <b>1.6</b>  | ns          | <b>1.8</b>  |
| Chemokine (C-C motif) ligand 5                       | <i>Ccl5</i>    | NM_013653     | Activated | ns   | -1.4        | ns   | <b>-1.6</b> | -1.3        | ns          |
| Profilin 2                                           | <i>Pfn2</i>    | NM_019410     | Activated | 1.4  | 1.3         | 1.4  | ns          | -1.3        | <b>1.6</b>  |
| Oxidative stress induced growth inhibitor 1          | <i>Osgin1</i>  | NM_027950     | Activated | 1.4  | 1.2         | 1.4  | ns          | 1.2         | <b>1.6</b>  |
| Interleukin 1 alpha                                  | <i>Il1a</i>    | NM_010554     | Activated | ns   | ns          | 1.2  | 1.2         | ns          | <b>1.6</b>  |
| HIV-1 tat interactive protein 2                      | <i>Htatip2</i> | NM_016865*    | Activated | 1.2  | ns          | 1.4  | 1.2         | ns          | <b>1.5</b>  |
| Aminolevulinic acid synthase 1                       | <i>Alas1</i>   | NM_001291835* | Activated | 1.4  | 1.3         | ns   | 1.3         | -1.4        | <b>3.1</b>  |
| ATP-binding cassette, subfamily C, member 3          | <i>Abcc3</i>   | NM_029600     | Activated | ns   | ns          | ns   | 1.3         | ns          | <b>1.6</b>  |
| ATP-binding cassette, subfamily G, member 2          | <i>Abcg2</i>   | NM_011920     | Affected  | ns   | ns          | ns   | <b>1.6</b>  | <b>1.5</b>  | 1.2         |
| Superoxide dismutase 2                               | <i>Sod2</i>    | NM_013671     | Affected  | 1.4  | 1.3         | 1.3  | 1.2         | -1.2        | <b>1.7</b>  |
| Vascular cell adhesion molecule 1                    | <i>Vcam1</i>   | NM_011693     | Inhibited | ns   | 1.1         | ns   | <b>1.5</b>  | <b>2.6</b>  | <b>-1.5</b> |
| Fibronectin 1                                        | <i>Fn1</i>     | NM_010233*    | Inhibited | -1.3 | <b>-1.5</b> | -1.3 | <b>-2</b>   | <b>-2.2</b> | <b>-1.6</b> |
| UDP glucuronosyltransferase 1 family, polypeptide A1 | <i>Ugt1a1</i>  | NM_201645     | Inhibited | 1.2  | ns          | ns   | ns          | 1.3         | <b>-1.8</b> |
| Solute carrier family 30, member 4                   | <i>Slc30a4</i> | NM_011774*    | Inhibited | ns   | ns          | -1.2 | ns          | 1.5         | <b>-1.6</b> |
| Phorbol-12-myristate-13-acetate-induced protein 1    | <i>Pmaip1</i>  | NM_021451     | Inhibited | 1.2  | ns          | 1.4  | ns          | ns          | <b>1.9</b>  |
| Myocyte enhancer factor 2C                           | <i>Mef2c</i>   | NM_001170537* | Inhibited | ns   | ns          | ns   | -1.2        | 1.3         | <b>-1.6</b> |
| Lipoprotein lipase                                   | <i>Lpl</i>     | NM_008509     | Inhibited | -1.3 | -1.4        | 1.2  | -1.5        | -1.4        | <b>1.8</b>  |
| Aryl-hydrocarbon receptor                            | <i>Ahr</i>     | NM_013464     | Inhibited | ns   | ns          | ns   | <b>-1.5</b> | ns          | <b>-2.5</b> |

#### Nuclear factor of kappa light polypeptide gene enhancer in B cells 1 (NFKB1)

|                                                 |                |               |           |             |             |             |             |             |             |
|-------------------------------------------------|----------------|---------------|-----------|-------------|-------------|-------------|-------------|-------------|-------------|
| D site albumin promoter binding protein         | <i>Dbp</i>     | NM_016974     | Activated | <b>3.3</b>  | <b>3.4</b>  | ns          | <b>2.9</b>  | <b>1.6</b>  | <b>2</b>    |
| Deleted in malignant brain tumors               | <i>Dmbt1</i>   | NM_007769     | Activated | <b>3.3</b>  | -1.5        | <b>3.8</b>  | ns          | ns          | ns          |
| Nuclear receptor subfamily 1, group D, member 1 | <i>Nr1d1</i>   | NM_145434     | Activated | <b>2.6</b>  | <b>2.2</b>  | 1.3         | 1.2         | -3          | <b>2.5</b>  |
| Nicotinamide phosphoribosyltransferase          | <i>Nampt</i>   | NM_021524     | Activated | <b>1.7</b>  | <b>1.5</b>  | <b>1.6</b>  | 1.3         | ns          | <b>1.5</b>  |
| Chemokine (C-X-C motif) ligand 2                | <i>Cxcl2</i>   | NM_009140     | Activated | <b>1.7</b>  | <b>1.7</b>  | <b>2</b>    | -1.3        | -2.1        | <b>2.2</b>  |
| Tumor necrosis factor                           | <i>Tnf</i>     | NM_013693*    | Activated | <b>1.6</b>  | 1.4         | <b>1.5</b>  | 1.3         | -1.3        | <b>2.1</b>  |
| Polo-like kinase 2                              | <i>Plk2</i>    | NM_152804     | Activated | <b>1.6</b>  | 1.4         | 1.4         | ns          | -1.5        | <b>1.7</b>  |
| Chemokine (C-C motif) ligand 3                  | <i>Ccl3</i>    | NM_011337     | Activated | <b>1.6</b>  | 1.3         | <b>1.6</b>  | <b>1.7</b>  | ns          | <b>1.7</b>  |
| Chemokine (C-X-C motif) ligand 3                | <i>Cxcl3</i>   | NM_203320     | Activated | <b>1.5</b>  | 1.4         | <b>1.8</b>  | ns          | -1.8        | <b>2.7</b>  |
| Chemokine (C-X-C motif) ligand 1                | <i>Cxcl1</i>   | NM_008176     | Activated | 1.4         | ns          | <b>1.6</b>  | ns          | -1.4        | 1.2         |
| Solute carrier family 22, member 4              | <i>Slc22a4</i> | NM_019687     | Activated | 1.3         | 1.3         | <b>1.5</b>  | 1.4         | ns          | <b>2</b>    |
| Transferrin receptor                            | <i>Tfrc</i>    | NM_011638     | Activated | ns          | 1.3         | <b>1.5</b>  | 1.3         | <b>1.7</b>  | 1.4         |
| Growth differentiation factor 15                | <i>Gdf15</i>   | NM_011819     | Affected  | <b>2.2</b>  | <b>1.5</b>  | <b>1.6</b>  | <b>1.9</b>  | <b>2.4</b>  | ns          |
| BPI fold containing family A, member 1          | <i>Bpifa1</i>  | NM_011126     | Affected  | 1.4         | -1.6        | <b>1.8</b>  | -1.8        | -2.4        | ns          |
| Surfactant associated protein A1                | <i>Sftpa1</i>  | NM_023134     | Affected  | 1.3         | ns          | <b>-1.8</b> | -1.1        | <b>-2</b>   | -1.4        |
| Epithelial cell adhesion molecule               | <i>Epcam</i>   | NM_008532     | Affected  | -1.4        | -1.4        | <b>-2.2</b> | <b>-3.9</b> | <b>-2.1</b> | <b>-3.3</b> |
| Fibroblast growth factor 1                      | <i>Fgf1</i>    | NM_010197     | Affected  | <b>-1.6</b> | ns          | ns          | <b>-1.8</b> | 1.2         | -1.3        |
| Heme oxygenase 1                                | <i>Hmox1</i>   | NM_010442     | Activated | <b>2</b>    | <b>1.6</b>  | <b>2.6</b>  | -1.3        | -2.3        | <b>3.9</b>  |
| Chemokine (C-C motif) receptor 7                | <i>Ccr7</i>    | NM_007719     | Inhibited | <b>-1.5</b> | <b>-1.7</b> | 1.4         | <b>-3</b>   | <b>-2.1</b> | 1.1         |
| Cardiotrophin-like cytokine factor 1            | <i>Clcf1</i>   | NM_019952     | Inhibited | <b>-1.6</b> | ns          | ns          | <b>-1.6</b> | -1.4        | ns          |
| Class II transactivator                         | <i>Ciita</i>   | NM_001243760* | Inhibited | <b>-1.6</b> | ns          | ns          | <b>-1.9</b> | -1.3        | 1.4         |
| CD74 antigen                                    | <i>Cd74</i>    | NM_001042605* | Inhibited | <b>-2</b>   | <b>-1.8</b> | 1.4         | <b>-2.9</b> | <b>-1.7</b> | 1.4         |

|                                                                      |                |            |           |      |      |      |      |      |      |
|----------------------------------------------------------------------|----------------|------------|-----------|------|------|------|------|------|------|
| TNFAIP3 interacting protein 1                                        | <i>Tnip1</i>   | NM_021327* | Activated | 1.4  | ns   | 1.2  | 1.4  | ns   | 1.6  |
| Tumor necrosis factor, alpha-induced protein 3                       | <i>Tnfaip3</i> | NM_009397* | Activated | ns   | ns   | 1.3  | ns   | -1.9 | 1.6  |
| Solute carrier family 2, member 6                                    | <i>Slc2a6</i>  | NM_172659* | Activated | 1.4  | 1.3  | ns   | 1.3  | ns   | 2    |
| Radical S-adenosyl methionine domain containing 2                    | <i>Rsad2</i>   | NM_021384  | Activated | ns   | ns   | 1.2  | ns   | -1.2 | 1.7  |
| Avian reticuloendotheliosis viral oncogene related B                 | <i>Relb</i>    | NM_009046* | Activated | 1.3  | ns   | 1.2  | 1.2  | ns   | 1.7  |
| Plasminogen activator, urokinase                                     | <i>Plau</i>    | NM_008873  | Activated | 1.4  | ns   | 1.3  | 1.2  | -1.2 | 1.5  |
| Nuclear factor of kappa light enhancer in B cells inhibitor, epsilon | <i>Nfkbie</i>  | NM_008690  | Activated | 1.4  | 1.2  | 1.4  | 1.3  | -1.3 | 2    |
| Nuclear factor of kappa light enhancer in B cells inhibitor, alpha   | <i>Nfkbia</i>  | NM_010907  | Activated | 1.4  | ns   | 1.3  | 1.3  | -1.5 | 1.5  |
| Nuclear factor of kappa light enhancer in B cells 2                  | <i>Nfkb2</i>   | NM_019408* | Activated | 1.2  | ns   | ns   | 1.3  | -1.4 | 1.7  |
| Interleukin 1 alpha                                                  | <i>Il1a</i>    | NM_010554  | Activated | ns   | ns   | 1.2  | 1.2  | ns   | 1.6  |
| Inhibitor of kappaB kinase epsilon                                   | <i>Ikbke</i>   | NM_019777  | Activated | ns   | 1.6  | ns   | 1.3  | -1.3 | 1.9  |
| Icos ligand                                                          | <i>Icosl</i>   | NM_015790  | Activated | ns   | 1.2  | ns   | 1.3  | -1.3 | 1.5  |
| Fatty acid binding protein 5                                         | <i>Fabp5</i>   | NM_010634* | Activated | -1.4 | 1.5  | -1.6 | 1.4  | -1.1 | 2.9  |
| Elongation factor RNA polymerase II 2                                | <i>Ell2</i>    | NM_138953  | Activated | ns   | 1.2  | 1.3  | ns   | ns   | 1.5  |
| Chemokine (C-X-C motif) ligand 10                                    | <i>Cxcl10</i>  | NM_021274  | Activated | 1.4  | ns   | 1.3  | ns   | -1.2 | 1.6  |
| Chemokine (C-X3-C motif) ligand 1                                    | <i>Cx3cl1</i>  | NM_009142  | Activated | ns   | ns   | -1.3 | ns   | ns   | 1.9  |
| Complement factor B                                                  | <i>Cfb</i>     | NM_008198* | Activated | ns   | ns   | 1.4  | ns   | -1.7 | 1.9  |
| Chemokine (C-C motif) ligand 22                                      | <i>Ccl22</i>   | NM_009137  | Activated | -1.4 | -1.7 | 1.4  | -1.7 | -1.7 | 2.4  |
| Chemokine (C-C motif) ligand 17                                      | <i>Ccl17</i>   | NM_011332  | Activated | -1.2 | -1.4 | ns   | -1.5 | -1.6 | 1.6  |
| Superoxide dismutase 2                                               | <i>Sod2</i>    | NM_013671  | Affected  | 1.4  | 1.3  | 1.3  | 1.2  | -1.2 | 1.7  |
| Intracellular adhesion molecule 1                                    | <i>Icam1</i>   | NM_010493  | Inhibited | 1.5  | 1.3  | ns   | 1.7  | ns   | 2.1  |
| Growth arrest and DNA damage inducible 45 alpha                      | <i>Gadd45a</i> | NM_007836  | Inhibited | 1.4  | 1.2  | 1.2  | 1.4  | ns   | 1.5  |
| FBJ osteosarcoma oncogene                                            | <i>Fos</i>     | NM_010234  | Inhibited | -1.5 | ns   | ns   | -2.1 | -1.8 | -1.9 |
| Fibronectin 1                                                        | <i>Fn1</i>     | NM_010233* | Inhibited | -1.3 | -1.5 | -1.3 | -2   | -2.2 | -1.6 |
| Apolipoprotein E                                                     | <i>ApoE</i>    | NM_009696  | Inhibited | ns   | -1.4 | ns   | -1.9 | -3.9 | 2.7  |

#### CCAAT/enhancer binding protein, beta (CEBPB)

|                                                       |                 |            |           |      |      |      |      |      |     |
|-------------------------------------------------------|-----------------|------------|-----------|------|------|------|------|------|-----|
| C-type lectin domain family 4, member e               | <i>Clec4e</i>   | NM_019948  | Activated | 2.4  | 2.3  | 1.6  | 1.4  | -1.4 | 2.8 |
| Cytochrome P450, family 2, subfamily a, polypeptide 5 | <i>Cyp2a5</i>   | NM_007812  | Activated | 2.1  | 1.3  | 1.4  | ns   | -1.2 | ns  |
| Heat shock protein 90, alpha, class A member 1        | <i>Hsp90aa1</i> | NM_010480  | Activated | 1.9  | 1.3  | 1.3  | ns   | -1.2 | ns  |
| WAP four-disulfide core domain 18                     | <i>Wfdc18</i>   | NM_007969  | Activated | 1.9  | ns   | 1.8  | ns   | ns   | ns  |
| Chemokine (C-X-C motif) ligand 2                      | <i>Cxcl2</i>    | NM_009140  | Activated | 1.7  | 1.7  | 2    | -1.3 | -2.1 | 2.2 |
| Aldehyde dehydrogenase family 1, subfamily A1         | <i>Aldh1a1</i>  | NM_013467  | Activated | 1.7  | ns   | 1.4  | ns   | -1.2 | ns  |
| Tumor necrosis factor                                 | <i>Tnf</i>      | NM_013693* | Activated | 1.6  | 1.4  | 1.5  | 1.3  | -1.3 | 2.1 |
| Chemokine (C-C motif) ligand 3                        | <i>Ccl3</i>     | NM_011337  | Activated | 1.6  | 1.3  | 1.6  | 1.7  | ns   | 1.7 |
| Aldo-keto reductase family 1, member B8               | <i>Akr1b8</i>   | NM_008012  | Activated | 1.5  | ns   | 1.8  | 1.6  | 1.4  | 2   |
| Chemokine (C-X-C motif) ligand 1                      | <i>Cxcl1</i>    | NM_008176  | Activated | 1.4  | ns   | 1.6  | ns   | -1.4 | 1.2 |
| Actin, alpha2, smooth muscle                          | <i>Acta2</i>    | NM_007392  | Activated | 1.4  | ns   | 1.5  | ns   | -1.2 | 1.4 |
| Hydroxysteroid (17-beta) dehydrogenase 4              | <i>Hsd17b4</i>  | NM_008292  | Activated | 1.3  | ns   | 1.5  | ns   | ns   | 2.9 |
| Small proline-rich protein 1A                         | <i>Sprr1a</i>   | NM_009264  | Activated | -1.2 | -1.5 | -1.5 | ns   | -1.3 | ns  |
| High mobility group AT-hook 1                         | <i>Hmga1</i>    | NM_016660* | Activated | ns   | ns   | 1.9  | ns   | -1.2 | 2.1 |
| Heat shock protein 1                                  | <i>Hspd1</i>    | NM_010477  | Affected  | 1.6  | ns   | 1.2  | ns   | ns   | ns  |

|                                                       |                 |               |           |             |             |             |             |             |             |
|-------------------------------------------------------|-----------------|---------------|-----------|-------------|-------------|-------------|-------------|-------------|-------------|
| Matrix Gla protein                                    | <i>Mgp</i>      | NM_008597     | Affected  | <b>1.5</b>  | <b>1.7</b>  | ns          | ns          | ns          | ns          |
| Hemoglobin, beta adult major chain                    | <i>Hbb-b1</i>   | NM_001278161  | Affected  | <b>-5.1</b> | <b>-2.7</b> | -1.1        | 1.4         | <b>-3.1</b> | 1.6         |
| Surfactant associated protein D                       | <i>Sftpd</i>    | NM_009160     | Inhibited | ns          | ns          | <b>-1.7</b> | ns          | <b>-1.6</b> | -1.2        |
| Pyruvate dehydrogenase kinase, isoenzyme 4            | <i>Pdk4</i>     | NM_013743     | Inhibited | <b>-1.5</b> | -1.4        | <b>-2.1</b> | -1.4        | ns          | ns          |
| Chemokine (C-C motif) receptor 5                      | <i>Ccr5</i>     | NM_009917     | Inhibited | <b>-1.6</b> | <b>-1.8</b> | -1.3        | <b>-2.2</b> | <b>-2.4</b> | ns          |
| Cold inducible RNA binding protein                    | <i>Cirbp</i>    | NM_007705     | Inhibited | <b>-1.6</b> | ns          | ns          | ns          | 1.3         | -1.3        |
| Stearoyl-coenzyme A desaturase 1                      | <i>Scd1</i>     | NM_009127     | Activated | ns          | -1.4        | ns          | -1.5        | -1.9        | <b>3.6</b>  |
| Fatty acid binding protein 4, adipocyte               | <i>Fabp4</i>    | NM_024406     | Activated | ns          | <b>1.7</b>  | -1.3        | <b>1.7</b>  | <b>1.6</b>  | <b>2.2</b>  |
| Aldo-keto reductase family 1, member B8               | <i>Akr1b8</i>   | NM_008012     | Activated | <b>1.5</b>  | ns          | <b>1.8</b>  | <b>1.6</b>  | 1.4         | <b>2</b>    |
| Inhibitor of kappaB kinase epsilon                    | <i>Ikbke</i>    | NM_019777     | Activated | ns          | <b>1.6</b>  | ns          | 1.3         | -1.3        | <b>1.9</b>  |
| Growth arrest and DNA damage inducible 45 alpha       | <i>Gadd45a</i>  | NM_007836     | Activated | 1.4         | 1.2         | 1.2         | 1.4         | ns          | <b>1.5</b>  |
| Insulin-like growth factor 1                          | <i>Igf1</i>     | NM_010512*    | Activated | ns          | ns          | 1.2         | <b>1.5</b>  | <b>2.3</b>  | <b>1.6</b>  |
| Xanthine dehydrogenase                                | <i>Xdh</i>      | NM_011723     | Activated | 1.2         | 1.3         | ns          | <b>1.8</b>  | <b>1.5</b>  | ns          |
| Nuclear receptor subfamily 1, group H, member 3       | <i>Nr1h3</i>    | NM_013839*    | Activated | 1.3         | ns          | ns          | <b>1.6</b>  | ns          | 1.3         |
| Myelocytomatosis oncogene                             | <i>Myc</i>      | NM_001177352* | Activated | -1.2        | -1.3        | -1.3        | <b>-1.6</b> | <b>-1.9</b> | -1.2        |
| Jun oncogene                                          | <i>Jun</i>      | NM_010591     | Activated | ns          | ns          | 1.2         | <b>-1.6</b> | <b>-1.6</b> | -1.2        |
| Intracellular adhesion molecule 1                     | <i>Icam1</i>    | NM_010493     | Affected  | <b>1.5</b>  | 1.3         | ns          | <b>1.7</b>  | ns          | <b>2.1</b>  |
| Colony stimulating factor 3 receptor                  | <i>Csf3r</i>    | NM_007782*    | Affected  | <b>-1.5</b> | ns          | -1.2        | <b>-1.7</b> | <b>-1.5</b> | <b>-2</b>   |
| Chemokine (C-C motif) ligand 5                        | <i>Ccl5</i>     | NM_013653     | Affected  | ns          | -1.4        | ns          | <b>-1.6</b> | -1.3        | ns          |
| Adenomatous polyposis coli down-regulated 1           | <i>Apcdd1</i>   | NM_133237     | Inhibited | ns          | ns          | -1.4        | -1.2        | -1.2        | <b>-1.5</b> |
| Diacylglycerol o-acyltransferase 2                    | <i>Dgat2</i>    | NM_026384     | Inhibited | ns          | -1.3        | -1.2        | <b>-1.7</b> | <b>-1.9</b> | <b>-1.6</b> |
| UDP glucuronosyltransferase 1 family, polypeptide A6B | <i>Ugt1a6b</i>  | NM_201410     | Inhibited | 1.2         | ns          | ns          | ns          | 1.3         | <b>-1.8</b> |
| FBJ osteosarcoma oncogene                             | <i>Fos</i>      | NM_010234     | Inhibited | <b>-1.5</b> | ns          | ns          | <b>-2.1</b> | <b>-1.8</b> | <b>-1.9</b> |
| Cd14 antigen                                          | <i>Cd14</i>     | NM_009841     | Inhibited | -1.3        | -1.4        | ns          | -1.2        | <b>-2.4</b> | <b>-2.1</b> |
| Cyclin D2                                             | <i>Ccnd2</i>    | NM_009829     | Inhibited | ns          | 1.3         | ns          | <b>1.8</b>  | <b>1.5</b>  | 1.4         |
| Transmembrane protein 176B                            | <i>Tmem176b</i> | NM_023056*    | Inhibited | ns          | -1.4        | ns          | <b>-1.6</b> | <b>-1.5</b> | ns          |
| Interleukin 12b                                       | <i>Il12b</i>    | NM_008352     | Inhibited | ns          | -1.3        | ns          | <b>-1.6</b> | -1.3        | ns          |

#### CCAAT/enhancer binding protein, alpha (CEBPA)

|                                                       |                |               |           |            |             |             |            |            |            |
|-------------------------------------------------------|----------------|---------------|-----------|------------|-------------|-------------|------------|------------|------------|
| Lactotransferrin                                      | <i>Ltf</i>     | NM_008522     | Activated | <b>2.4</b> | -1.8        | <b>3.6</b>  | ns         | -1.2       | ns         |
| Cytochrome P450, family 2, subfamily a, polypeptide 5 | <i>Cyp2a5</i>  | NM_007812     | Activated | <b>2.1</b> | 1.3         | 1.4         | ns         | -1.2       | ns         |
| Heme oxygenase 1                                      | <i>Hmox1</i>   | NM_010442     | Activated | <b>2</b>   | <b>1.6</b>  | <b>2.6</b>  | -1.3       | -2.3       | <b>3.9</b> |
| Secretoglobin, family 3A, member 2                    | <i>Scgb3a2</i> | NM_001289643* | Activated | <b>1.9</b> | ns          | <b>1.5</b>  | -1.2       | -1.4       | ns         |
| Secretoglobin, family 1A, member 1                    | <i>Scgb1a1</i> | NM_011681     | Activated | <b>1.6</b> | -1.3        | <b>1.7</b>  | -2.3       | -2.1       | -1.2       |
| Cathepsin K                                           | <i>Ctsk</i>    | NM_007802     | Activated | <b>1.5</b> | ns          | <b>1.9</b>  | <b>1.6</b> | <b>1.5</b> | <b>1.6</b> |
| Aldo-keto reductase family 1, member B8               | <i>Akr1b8</i>  | NM_008012     | Activated | <b>1.5</b> | ns          | <b>1.8</b>  | <b>1.6</b> | 1.4        | <b>2</b>   |
| Carboxylesterase 1D                                   | <i>Ces1D</i>   | NM_053200     | Activated | <b>1.5</b> | ns          | ns          | ns         | ns         | ns         |
| Epoxide hydrolase 1                                   | <i>Ephx1</i>   | NM_010145     | Activated | 1.4        | ns          | <b>1.5</b>  | <b>1.8</b> | 1.4        | <b>2.4</b> |
| Small proline-rich protein 1A                         | <i>Sprr1a</i>  | NM_009264     | Activated | -1.2       | <b>-1.5</b> | <b>-1.5</b> | ns         | -1.3       | ns         |
| Heat shock protein 5                                  | <i>Hspa5</i>   | NM_001163434* | Activated | <b>2</b>   | ns          | <b>1.5</b>  | ns         | -1.7       | ns         |
| Argininosuccinate synthetase 1                        | <i>Ass1</i>    | NM_007494     | Affected  | ns         | ns          | <b>1.6</b>  | ns         | ns         | ns         |
| Surfactant associated protein A1                      | <i>Sftpa1</i>  | NM_023134     | Affected  | 1.3        | ns          | <b>-1.8</b> | -1.1       | <b>-2</b>  | -1.4       |

|                                                   |                  |               |           |      |      |      |      |      |      |
|---------------------------------------------------|------------------|---------------|-----------|------|------|------|------|------|------|
| Surfactant associated protein D                   | <i>Sftpd</i>     | NM_009160     | Inhibited | ns   | ns   | -1.7 | ns   | -1.6 | -1.2 |
| Surfactant associated protein B                   | <i>Sftpb</i>     | NM_147779*    | Inhibited | ns   | ns   | -2   | -1.1 | -2   | -1.4 |
| Surfactant associated protein C                   | <i>Sftpc</i>     | NM_011359     | Inhibited | ns   | ns   | -2.6 | ns   | -2.4 | -1.7 |
| Nuclear factor, interleukin 3, regulated          | <i>Nfil3</i>     | NM_017373     | Inhibited | -2   | -1.7 | -1.3 | -2.7 | -2   | -1.9 |
| Stearoyl-coenzyme A desaturase 1                  | <i>Scd1</i>      | NM_009127     | Activated | ns   | -1.4 | ns   | -1.5 | -1.9 | 3.6  |
| Immunoresponsive gene 1                           | <i>Irg1</i>      | NM_008392     | Activated | 1.7  | 1.6  | 1.4  | 1.5  | -1.3 | 2.8  |
| Fatty acid binding protein 4, adipocyte           | <i>Fabp4</i>     | NM_024406     | Activated | ns   | 1.7  | -1.3 | 1.7  | 1.6  | 2.2  |
| Lipoprotein lipase                                | <i>Lpl</i>       | NM_008509     | Activated | -1.3 | -1.4 | 1.2  | -1.5 | -1.4 | 1.8  |
| Superoxide dismutase 2                            | <i>Sod2</i>      | NM_013671     | Activated | 1.4  | 1.3  | 1.3  | 1.2  | -1.2 | 1.7  |
| Profilin 2                                        | <i>Pfn2</i>      | NM_019410     | Activated | 1.4  | 1.3  | 1.4  | ns   | -1.3 | 1.6  |
| Insulin-like growth factor 1                      | <i>Igf1</i>      | NM_010512*    | Activated | ns   | ns   | 1.2  | 1.5  | 2.3  | 1.6  |
| Growth arrest and DNA damage inducible 45 alpha   | <i>Gadd45a</i>   | NM_007836     | Activated | 1.4  | 1.2  | 1.2  | 1.4  | ns   | 1.5  |
| Transforming growth factor, beta 2                | <i>Tgfb2</i>     | NM_009367     | Activated | ns   | ns   | ns   | ns   | ns   | -1.6 |
| ADP-ribosylation factor-like 4C                   | <i>Arl4c</i>     | NM_177305     | Activated | -1.4 | -1.7 | ns   | -2.5 | -1.5 | -1.7 |
| Platelet-activating factor receptor               | <i>Ptafr</i>     | NM_001081211  | Activated | 1.3  | ns   | 1.3  | 1.3  | ns   | 1.7  |
| Myelocytomatosis oncogene                         | <i>Myc</i>       | NM_001177352* | Activated | -1.2 | -1.3 | -1.3 | -1.6 | -1.9 | -1.2 |
| Jun oncogene                                      | <i>Jun</i>       | NM_010591     | Activated | ns   | ns   | 1.2  | -1.6 | -1.6 | -1.2 |
| Intracellular adhesion molecule 1                 | <i>Icam1</i>     | NM_010493     | Affected  | 1.5  | 1.3  | ns   | 1.7  | ns   | 2.1  |
| Diacylglycerol o-acyltransferase 2                | <i>Dgat2</i>     | NM_026384     | Affected  | ns   | -1.3 | -1.2 | -1.7 | -1.9 | -1.6 |
| Alanyl aminopeptidase                             | <i>Anpep</i>     | NM_008486     | Affected  | ns   | ns   | ns   | 1.9  | 2.1  | ns   |
| Galanin                                           | <i>Gal</i>       | NM_010253     | Inhibited | ns   | ns   | 1.2  | ns   | -1.6 | 1.5  |
| Interleukin 6 receptor, alpha                     | <i>Il6ra</i>     | NM_010559     | Inhibited | ns   | ns   | -1.3 | -1.2 | -1.3 | -1.5 |
| Adenomatous polyposis coli down-regulated 1       | <i>Apcdd1</i>    | NM_133237     | Inhibited | ns   | ns   | -1.4 | -1.2 | -1.2 | -1.5 |
| FBJ osteosarcoma oncogene                         | <i>Fos</i>       | NM_010234     | Inhibited | -1.5 | ns   | ns   | -2.1 | -1.8 | -1.9 |
| Colony stimulating factor 3 receptor              | <i>Csf3r</i>     | NM_007782*    | Inhibited | -1.5 | ns   | -1.2 | -1.7 | -1.5 | -2   |
| Cd14 antigen                                      | <i>Cd14</i>      | NM_009841     | Inhibited | -1.3 | -1.4 | ns   | -1.2 | -2.4 | -2.1 |
| High mobility group AT-hook 1, related sequence 1 | <i>Hmga1-rs1</i> | NM_001166476* | Inhibited | ns   | ns   | -2   | ns   | ns   | -2.4 |
| MAP kinase-activated protein kinase 2             | <i>Mapkapk2</i>  | NM_008551     | Inhibited | ns   | ns   | 1.3  | 1.3  | ns   | 1.6  |
| Cyclin D2                                         | <i>Ccnd2</i>     | NM_009829     | Inhibited | ns   | 1.3  | ns   | 1.8  | 1.5  | 1.4  |
| Interleukin 12b                                   | <i>Il12b</i>     | NM_008352     | Inhibited | ns   | -1.3 | ns   | -1.6 | -1.3 | ns   |
| B cell translocation gene 2                       | <i>Btg2</i>      | NM_007570     | Inhibited | -1.3 | ns   | ns   | -1.8 | -1.6 | -1.2 |
| Hydroxyprostaglandin dehydrogenase 15             | <i>Hpgd</i>      | NM_008278     | Inhibited | -1.3 | -1.3 | ns   | -1.8 | -1.8 | -1.3 |

#### X-box binding protein 1 (XBP1)

|                                          |                |               |           |     |     |     |     |      |     |
|------------------------------------------|----------------|---------------|-----------|-----|-----|-----|-----|------|-----|
| Tumor necrosis factor                    | <i>Tnf</i>     | NM_013693*    | Activated | 1.6 | 1.4 | 1.5 | 1.3 | -1.3 | 2.1 |
| Sec24 related gene family, member D      | <i>Sec24d</i>  | NM_027135     | Activated | 1.5 | ns  | 1.3 | ns  | -1.3 | 1.3 |
| Stromal cell-derived factor 2-like 1     | <i>Sdf2l1</i>  | NM_022324     | Activated | 1.8 | ns  | 1.2 | 1.2 | -1.4 | ns  |
| Protein disulfide isomerase associated 6 | <i>Pdia6</i>   | NM_027959     | Activated | 1.6 | ns  | ns  | ns  | -1.2 | ns  |
| Protein disulfide isomerase associated 4 | <i>Pdia4</i>   | NM_009787     | Activated | 1.6 | ns  | ns  | ns  | -1.3 | ns  |
| Hypoxia upregulated 1                    | <i>Hyou1</i>   | NM_021395     | Activated | 1.6 | ns  | ns  | ns  | -1.4 | ns  |
| Heat shock protein 5                     | <i>Hspa5</i>   | NM_001163434* | Activated | 2   | ns  | 1.5 | ns  | -1.7 | ns  |
| Heat shock protein 90, beta, member 1    | <i>Hsp90b1</i> | NM_011631     | Activated | 1.6 | ns  | ns  | 1.2 | ns   | ns  |

|                                                |                 |               |           |             |             |            |             |             |             |
|------------------------------------------------|-----------------|---------------|-----------|-------------|-------------|------------|-------------|-------------|-------------|
| Heat shock protein 90, alpha, class A member 1 | <i>Hsp90aa1</i> | NM_010480     | Activated | <b>1.9</b>  | 1.3         | 1.3        | ns          | -1.2        | ns          |
| Heat shock protein 90, alpha, class B member 1 | <i>Hsp90ab1</i> | NM_008302     | Activated | <b>1.7</b>  | 1.4         | ns         | 1.3         | ns          | ns          |
| Heat shock 105kDa/110kDa protein 1             | <i>Hsph1</i>    | NM_013559     | Activated | <b>2.7</b>  | 1.3         | <b>1.6</b> |             |             |             |
| Heme oxygenase 1                               | <i>Hmox1</i>    | NM_010442     | Activated | <b>2</b>    | <b>1.6</b>  | <b>2.6</b> | -1.3        | -2.3        | <b>3.9</b>  |
| Alpha fetoprotein                              | <i>Afp</i>      | NM_007423     | Activated | ns          | ns          | <b>1.5</b> | ns          | -1.2        | 1.3         |
| DnaJ (Hsp40) homolog, subfamily C, member 3    | <i>Dnajc3</i>   | NM_008929     | Activated | <b>1.5</b>  | ns          | ns         | ns          | -1.3        | ns          |
| DnaJ (Hsp40) homolog, subfamily B, member 9    | <i>Dnajb9</i>   | NM_013760     | Activated | <b>1.6</b>  | ns          | ns         | ns          | -1.6        | ns          |
| Calreticulin                                   | <i>Calr</i>     | NM_007591     | Activated | <b>1.5</b>  | ns          | ns         | 1.2         | ns          | ns          |
| S100 calcium binding protein A6                | <i>S100a6</i>   | NM_011313     | Affected  | <b>-1.7</b> | <b>-1.7</b> | -1.2       | <b>-2.8</b> | <b>-2.7</b> | -1.2        |
| Chemokine (C-X-C motif) ligand 1               | <i>Cxcl1</i>    | NM_008176     | Inhibited | 1.4         | ns          | <b>1.6</b> | ns          | -1.5        | 1.2         |
| Catalase                                       | <i>Cat</i>      | NM_009804     | Activated | 1.3         | <b>1.6</b>  | 1.2        | <b>1.6</b>  | ns          | <b>1.8</b>  |
| Fibronectin 1                                  | <i>Fn1</i>      | NM_010233*    | Activated | -1.3        | <b>-1.5</b> | -1.3       | <b>-2</b>   | <b>-2.2</b> | <b>-1.6</b> |
| Der1-like domain family, member 3              | <i>Derl3</i>    | NM_024440     | Affected  | 1.3         | ns          | ns         | 1.3         | ns          | 1.2         |
| Homocysteine and ER stress inducible member 1  | <i>Herpud1</i>  | NM_022331     | Affected  | 1.3         | -1.4        | 1.4        | -1.4        | <b>-1.7</b> | -1.2        |
| Vascular cell adhesion molecule 1              | <i>Vcam1</i>    | NM_011693     | Affected  | ns          | 1.1         | ns         | <b>1.5</b>  | <b>2.6</b>  | -1.5        |
| Myelocytomatosis oncogene                      | <i>Myc</i>      | NM_001177352* | Affected  | -1.2        | -1.3        | -1.3       | <b>-1.6</b> | <b>-1.9</b> | -1.2        |
| Intracellular adhesion molecule 1              | <i>Icam1</i>    | NM_010493     | Inhibited | <b>1.5</b>  | 1.3         | ns         | <b>1.7</b>  | ns          | <b>2.1</b>  |
| E26 avian leukemia oncogene 1                  | <i>Ets1</i>     | NM_011808*    | Inhibited | -1.2        | ns          | ns         | <b>-1.8</b> | -1.4        | ns          |

#### Early growth response 1 (EGR1)

|                                                 |                |               |           |             |             |            |             |             |             |
|-------------------------------------------------|----------------|---------------|-----------|-------------|-------------|------------|-------------|-------------|-------------|
| Growth differentiation factor 15                | <i>Gdf15</i>   | NM_011819     | Activated | <b>2.2</b>  | <b>1.5</b>  | <b>1.6</b> | <b>1.9</b>  | <b>2.4</b>  | ns          |
| Heme oxygenase 1                                | <i>Hmox1</i>   | NM_010442     | Activated | <b>2</b>    | <b>1.6</b>  | <b>2.6</b> | -1.3        | <b>-2.3</b> | <b>3.9</b>  |
| Chemokine (C-X-C motif) ligand 2                | <i>Cxcl2</i>   | NM_009140     | Activated | <b>1.7</b>  | <b>1.7</b>  | <b>2</b>   | -1.3        | <b>-2.1</b> | <b>2.2</b>  |
| Tumor necrosis factor                           | <i>Tnf</i>     | NM_013693*    | Activated | <b>1.6</b>  | 1.4         | <b>1.5</b> | 1.3         | -1.3        | <b>2.1</b>  |
| Chemokine (C-C motif) ligand 3                  | <i>Ccl3</i>    | NM_011337     | Activated | <b>1.6</b>  | 1.3         | <b>1.6</b> | <b>1.7</b>  | ns          | <b>1.7</b>  |
| Chemokine (C-C motif) ligand 9                  | <i>Ccl9</i>    | NM_011338     | Activated | <b>1.5</b>  | ns          | ns         | <b>2</b>    | <b>-1.8</b> | <b>1.6</b>  |
| Cyclin D2                                       | <i>Ccnd2</i>   | NM_009829     | Activated | ns          | 1.3         | ns         | <b>1.8</b>  | <b>1.5</b>  | 1.4         |
| Intracellular adhesion molecule 1               | <i>Icam1</i>   | NM_010493     | Activated | <b>1.5</b>  | 1.3         | ns         | <b>1.7</b>  | ns          | <b>2.1</b>  |
| Heparanase                                      | <i>Hpse</i>    | NM_152803     | Activated | 1.3         | ns          | 1.3        | <b>1.7</b>  | <b>1.5</b>  | ns          |
| Chemokine (C-C motif) ligand 6                  | <i>Ccl6</i>    | NM_009139     | Activated | 1.4         | ns          | ns         | <b>1.6</b>  | 1.2         | ns          |
| Malic enzyme 1, NADP(+)-dependent, cytosolic    | <i>Me1</i>     | NM_008615     | Activated | 1.4         | 1.2         | 1.4        | <b>1.6</b>  | ns          | <b>2</b>    |
| Vascular cell adhesion molecule 1               | <i>Vcam1</i>   | NM_011693     | Activated | ns          | 1.1         | ns         | <b>1.5</b>  | <b>2.6</b>  | <b>-1.5</b> |
| Myelocytomatosis oncogene                       | <i>Myc</i>     | NM_001177352* | Activated | -1.2        | -1.3        | -1.3       | <b>-1.6</b> | <b>-1.9</b> | -1.2        |
| MAX dimerization protein 1                      | <i>Mxd1</i>    | NM_010751     | Affected  | -1.3        | ns          | ns         | <b>-1.6</b> | <b>-1.5</b> | <b>-1.5</b> |
| Early growth response 1                         | <i>Egr1</i>    | NM_007913     | Affected  | ns          | ns          | 1.4        | <b>-1.8</b> | <b>-1.6</b> | -1.4        |
| Superoxide dismutase 2                          | <i>Sod2</i>    | NM_013671     | Affected  | 1.4         | 1.3         | 1.3        | 1.2         | -1.2        | <b>1.7</b>  |
| Growth arrest and DNA damage inducible 45 alpha | <i>Gadd45a</i> | NM_007836     | Affected  | 1.4         | 1.2         | 1.2        | 1.4         | ns          | <b>1.5</b>  |
| Jun oncogene                                    | <i>Jun</i>     | NM_010591     | Inhibited | ns          | ns          | 1.2        | <b>-1.6</b> | <b>-1.6</b> | -1.2        |
| Fibronectin 1                                   | <i>Fn1</i>     | NM_010233*    | Inhibited | -1.3        | <b>-1.5</b> | -1.3       | <b>-2</b>   | <b>-2.2</b> | <b>-1.6</b> |
| Chemokine (C-C motif) receptor 2                | <i>Ccr2</i>    | NM_009915     | Inhibited | <b>-1.5</b> | <b>-1.5</b> | ns         | <b>-2</b>   | <b>-1.6</b> | ns          |
| Plasminogen activator, urokinase                | <i>Plau</i>    | NM_008873     | Inhibited | 1.4         | ns          | 1.3        | 1.2         | -1.2        | <b>1.5</b>  |

**1 - NOTES**

C57 = Smoked C57 mice compared to control C57 mice

RAGE = Smoked RAGE mice compared to control RAGE mice

CS = C57 smoked mice compared to RAGE smoked mice

Red font = statistically significant (Fold  $\geq 1.5$  and FDR  $< 0.05$ )

ns = not significant (FDR  $> 0.05$ )

\* Gene has more than one isoform

**Supplementary Table 5. Predicted Upstream Regulators**

| <i>Cytokines</i>                            | <i>Symbol</i>  | RefSeq ID     | Prediction | 7-Day Fold <sup>1</sup> |             |             |
|---------------------------------------------|----------------|---------------|------------|-------------------------|-------------|-------------|
|                                             |                |               |            | C57                     | RAGE        | CS          |
| <u>Tumor necrosis factor (TNF)</u>          |                |               |            |                         |             |             |
| Deleted in malignant brain tumors           | <i>Dmbt1</i>   | NM_007769     | Activated  | <b>3.3</b>              | -1.5        | <b>3.8</b>  |
| C-type lectin domain family 4, member e     | <i>Clec4e</i>  | NM_019948     | Activated  | <b>2.4</b>              | <b>2.3</b>  | <b>1.6</b>  |
| Growth differentiation factor 15            | <i>Gdf15</i>   | NM_011819     | Activated  | <b>2.2</b>              | <b>1.5</b>  | <b>1.6</b>  |
| Sequestosome 1                              | <i>Sqstm1</i>  | NM_011018*    | Activated  | <b>2</b>                | ns          | <b>1.6</b>  |
| Heme oxygenase 1                            | <i>Hmox1</i>   | NM_010442     | Activated  | <b>2</b>                | <b>1.6</b>  | <b>2.6</b>  |
| Thioredoxin reductase 1                     | <i>Txnrd1</i>  | NM_001042523* | Activated  | <b>1.7</b>              | <b>1.5</b>  | <b>1.6</b>  |
| Nicotinamide phosphoribosyltransferase      | <i>Nampt</i>   | NM_021524     | Activated  | <b>1.7</b>              | <b>1.5</b>  | <b>1.6</b>  |
| Immunoresponsive gene 1                     | <i>Irg1</i>    | NM_008392     | Activated  | <b>1.7</b>              | <b>1.6</b>  | 1.4         |
| Chemokine (C-X-C motif) ligand 2            | <i>Cxcl2</i>   | NM_009140     | Activated  | <b>1.7</b>              | <b>1.7</b>  | <b>2</b>    |
| Tumor necrosis factor                       | <i>Tnf</i>     | NM_013693*    | Activated  | <b>1.6</b>              | 1.4         | <b>1.5</b>  |
| Mesothelin                                  | <i>Msln</i>    | NM_018857     | Activated  | <b>1.6</b>              | -1.4        | <b>1.8</b>  |
| Heat shock protein 1                        | <i>Hspd1</i>   | NM_010477     | Activated  | <b>1.6</b>              | ns          | 1.2         |
| Glutamate-cysteine ligase, modifier subunit | <i>Gclm</i>    | NM_008129     | Activated  | <b>1.6</b>              | <b>1.5</b>  | <b>1.7</b>  |
| Chemokine (C-C motif) ligand 3              | <i>Ccl3</i>    | NM_011337     | Activated  | <b>1.6</b>              | 1.3         | <b>1.6</b>  |
| ATP-binding cassette, subfamily C, member 1 | <i>Abcc1</i>   | NM_008576     | Activated  | <b>1.6</b>              | <b>1.6</b>  | <b>1.5</b>  |
| Metallothionein 2                           | <i>Mt2</i>     | NM_008630     | Activated  | <b>1.5</b>              | 1.3         | <b>2</b>    |
| Matrix Gla protein                          | <i>Mgp</i>     | NM_008597     | Activated  | <b>1.5</b>              | <b>1.7</b>  | ns          |
| Interleukin 1 family, member 9              | <i>Il1f9</i>   | NM_153511     | Activated  | <b>1.5</b>              | <b>1.6</b>  | ns          |
| Chemokine (C-X-C motif) ligand 3            | <i>Cxcl3</i>   | NM_203320     | Activated  | <b>1.5</b>              | 1.4         | <b>1.8</b>  |
| Chemokine (C-C motif) ligand 9              | <i>Ccl9</i>    | NM_011338     | Activated  | <b>1.5</b>              | ns          | ns          |
| Aldehyde dehydrogenase 2                    | <i>Aldh2</i>   | NM_009656     | Activated  | <b>1.5</b>              | 1.4         | 1.3         |
| Aldo-keto reductase family 1, member B8     | <i>Akr1b8</i>  | NM_008012     | Activated  | <b>1.5</b>              | ns          | <b>1.8</b>  |
| Chemokine (C-X-C motif) ligand 1            | <i>Cxcl1</i>   | NM_008176     | Activated  | 1.4                     | ns          | <b>1.6</b>  |
| Solute carrier family 22, member 4          | <i>Slc22a4</i> | NM_019687     | Activated  | 1.3                     | 1.3         | <b>1.5</b>  |
| Complement component 5a receptor 1          | <i>C5ar1</i>   | NM_007577*    | Activated  | -1.2                    | ns          | <b>-1.7</b> |
| Fatty acid binding protein 5                | <i>Fabp5</i>   | NM_010634*    | Activated  | -1.4                    | 1.5         | <b>-1.6</b> |
| Vasohibin 1                                 | <i>Vash1</i>   | NM_177354     | Activated  | <b>-1.5</b>             | -1.3        | ns          |
| Class II transactivator                     | <i>Ciita</i>   | NM_001243760* | Activated  | <b>-1.6</b>             | ns          | ns          |
| Chemokine (C-C motif) receptor 5            | <i>Ccr5</i>    | NM_009917     | Activated  | <b>-1.6</b>             | <b>-1.8</b> | -1.3        |
| Fatty acid binding protein 1                | <i>Fabp1</i>   | NM_0179399    | Activated  | <b>-1.7</b>             | ns          | -1.3        |

|                                                |                 |               |           |             |             |             |
|------------------------------------------------|-----------------|---------------|-----------|-------------|-------------|-------------|
| Histocompatibility 2, T region locus 23        | <i>H2-T23</i>   | NM_010398     | Activated | ns          | ns          | <b>2.2</b>  |
| Cholesterol 25-hydroxylase                     | <i>Ch25h</i>    | NM_009890     | Activated | ns          | ns          | <b>1.8</b>  |
| Argininosuccinate synthetase 1                 | <i>Ass1</i>     | NM_007494     | Activated | ns          | ns          | <b>1.6</b>  |
| Secreted acidic cysteine rich glycoprotein     | <i>Sparc</i>    | NM_009242*    | Activated | ns          | ns          | <b>-1.9</b> |
| Surfactant associated protein B                | <i>Sftpb</i>    | NM_147779*    | Activated | ns          | ns          | <b>-2</b>   |
| Heat shock protein 1B                          | <i>Hspa1b</i>   | NM_010478     | Affected  | <b>3.2</b>  | <b>1.6</b>  | <b>3.4</b>  |
| Polo-like kinase 2                             | <i>Plk2</i>     | NM_152804     | Affected  | <b>1.6</b>  | 1.4         | 1.4         |
| Metallothionein 1                              | <i>Mt1</i>      | NM_013602     | Affected  | 1.4         | 1.3         | <b>1.7</b>  |
| NAD(P)H dehydrogenase, quinone 1               | <i>Nqo1</i>     | NM_008706     | Affected  | 1.4         | 1.4         | <b>1.5</b>  |
| Cardiotrophin-like cytokine factor 1           | <i>Clcf1</i>    | NM_019952     | Affected  | <b>-1.6</b> | ns          | ns          |
| Transferrin receptor                           | <i>Tfrc</i>     | NM_011638     | Inhibited | ns          | 1.3         | <b>1.5</b>  |
| Heparin-binding EGF-like growth factor         | <i>Hbegf</i>    | NM_010415     | Inhibited | ns          | ns          | <b>-1.5</b> |
| Eph receptor A2                                | <i>Epha2</i>    | NM_010139     | Inhibited | ns          | -1.3        | <b>-1.5</b> |
| Leucine-rich alpha-2-glycoprotein 1            | <i>Lrg1</i>     | NM_029796     | Inhibited | ns          | ns          | <b>-1.5</b> |
| Clusterin                                      | <i>Clu</i>      | NM_013492     | Inhibited | ns          | <b>-1.5</b> | <b>-1.7</b> |
| Laminin, gamma 2                               | <i>Lamc2</i>    | NM_008485     | Inhibited | ns          | ns          | <b>-1.8</b> |
| Epithelial membrane protein 2                  | <i>Emp2</i>     | NM_007929     | Inhibited | ns          | ns          | <b>-1.8</b> |
| Heat shock protein 8                           | <i>Hspa8</i>    | NM031165      | Inhibited | <b>2.3</b>  | ns          | 1.3         |
| Period circadian clock 2                       | <i>Per2</i>     | NM_011066     | Inhibited | <b>2.1</b>  | <b>3</b>    | -1.5        |
| Heat shock protein 90, alpha, class B member 1 | <i>Hsp90ab1</i> | NM_008302     | Inhibited | <b>1.7</b>  | 1.4         | ns          |
| Protein disulfide isomerase associated 4       | <i>Pdia4</i>    | NM_009787     | Inhibited | <b>1.6</b>  | ns          | ns          |
| Pyruvate carboxylase                           | <i>Pcx</i>      | NM_001162946* | Inhibited | <b>1.6</b>  | <b>1.5</b>  | ns          |
| Calreticulin                                   | <i>Calr</i>     | NM_007591     | Inhibited | <b>1.5</b>  | ns          | ns          |
| Chemokine (C-C motif) receptor 7               | <i>Ccr7</i>     | NM_007719     | Inhibited | <b>-1.5</b> | <b>-1.7</b> | 1.4         |
| Dual specificity phosphatase 1                 | <i>Dusp1</i>    | NM_013642     | Inhibited | <b>-1.7</b> | ns          | ns          |

#### Interferon gamma (IFNG)

|                                                |                 |            |           |            |            |            |
|------------------------------------------------|-----------------|------------|-----------|------------|------------|------------|
| Heat shock protein 1B                          | <i>Hspa1b</i>   | NM_010478  | Activated | <b>3.2</b> | <b>1.6</b> | <b>3.4</b> |
| Solute carrier family 7, member 11             | <i>Slc7a11</i>  | NM_011990  | Activated | <b>2.6</b> | <b>2.8</b> | <b>2.3</b> |
| C-type lectin domain family 4, member e        | <i>Clec4e</i>   | NM_019948  | Activated | <b>2.4</b> | <b>2.3</b> | <b>1.6</b> |
| Growth differentiation factor 15               | <i>Gdf15</i>    | NM_011819  | Activated | <b>2.2</b> | <b>1.5</b> | <b>1.6</b> |
| Heme oxygenase 1                               | <i>Hmox1</i>    | NM_010442  | Activated | <b>2</b>   | <b>1.6</b> | <b>2.6</b> |
| Sequestosome 1                                 | <i>Sqstm1</i>   | NM_011018* | Activated | <b>2</b>   | ns         | <b>1.6</b> |
| Heat shock protein 90, alpha, class A member 1 | <i>Hsp90aa1</i> | NM_010480  | Activated | <b>1.9</b> | 1.3        | 1.3        |



|                                                 |                 |               |           |             |            |             |
|-------------------------------------------------|-----------------|---------------|-----------|-------------|------------|-------------|
| WAP four-disulfide core domain 18               | <i>Wfdc18</i>   | NM_007969     | Activated | <b>1.9</b>  | ns         | <b>1.8</b>  |
| Solute carrier family 11, member 1              | <i>Slc11a1</i>  | NM_013612     | Activated | <b>1.8</b>  | <b>2</b>   | <b>1.7</b>  |
| Cd63 antigen                                    | <i>Cd63</i>     | NM_001042580* | Activated | <b>1.7</b>  | 1.3        | 1.3         |
| Chemokine (C-X-C motif) ligand 2                | <i>Cxcl2</i>    | NM_009140     | Activated | <b>1.7</b>  | <b>1.7</b> | <b>2</b>    |
| Heat shock protein 90, alpha, class B member 1  | <i>Hsp90ab1</i> | NM_008302     | Activated | <b>1.7</b>  | 1.4        | ns          |
| Immunoresponsive gene 1                         | <i>Irg1</i>     | NM_008392     | Activated | <b>1.7</b>  | <b>1.6</b> | 1.4         |
| Nicotinamide phosphoribosyltransferase          | <i>Nampt</i>    | NM_021524     | Activated | <b>1.7</b>  | <b>1.5</b> | <b>1.6</b>  |
| Chemokine (C-C motif) ligand 3                  | <i>Ccl3</i>     | NM_011337     | Activated | <b>1.6</b>  | 1.3        | <b>1.6</b>  |
| Heat shock protein 1                            | <i>Hspd1</i>    | NM_010477     | Activated | <b>1.6</b>  | ns         | 1.2         |
| Tumor necrosis factor                           | <i>Tnf</i>      | NM_013693*    | Activated | <b>1.6</b>  | 1.4        | <b>1.5</b>  |
| Cathepsin K                                     | <i>Ctsk</i>     | NM_007802     | Activated | <b>1.5</b>  | ns         | <b>1.9</b>  |
| Chemokine (C-X-C motif) ligand 3                | <i>Cxcl3</i>    | NM_203320     | Activated | <b>1.5</b>  | 1.4        | <b>1.8</b>  |
| Interleukin 1 family, member 9                  | <i>Il1f9</i>    | NM_153511     | Activated | <b>1.5</b>  | <b>1.6</b> | ns          |
| Chemokine (C-X-C motif) ligand 1                | <i>Cxcl1</i>    | NM_008176     | Activated | 1.4         | ns         | <b>1.6</b>  |
| Metallothionein 1                               | <i>Mt1</i>      | NM_013602     | Activated | 1.4         | 1.3        | <b>1.7</b>  |
| Hydroxysteroid (17-beta) dehydrogenase 4        | <i>Hsd17b4</i>  | NM_008292     | Activated | 1.3         | ns         | <b>1.5</b>  |
| Dual specificity phosphatase 1                  | <i>Dusp1</i>    | NM_013642     | Activated | <b>-1.7</b> | ns         | ns          |
| Argininosuccinate synthetase 1                  | <i>Ass1</i>     | NM_007494     | Activated | ns          | ns         | <b>1.6</b>  |
| Cholesterol 25-hydroxylase                      | <i>Ch25h</i>    | NM_009890     | Activated | ns          | ns         | <b>1.8</b>  |
| Histocompatibility 2, M region locus 3          | <i>H2-M3</i>    | NM_013819     | Activated | ns          | ns         | <b>1.6</b>  |
| Histocompatibility 2, T region locus 23         | <i>H2-T23</i>   | NM_010398     | Activated | ns          | ns         | <b>2.2</b>  |
| High mobility group AT-hook 1                   | <i>Hmga1</i>    | NM_016660*    | Activated | ns          | ns         | <b>1.9</b>  |
| Transferrin receptor                            | <i>Tfrc</i>     | NM_011638     | Activated | ns          | 1.3        | <b>1.5</b>  |
| D site albumin promoter binding protein         | <i>Dbp</i>      | NM_016974     | Affected  | <b>3.3</b>  | <b>3.4</b> | ns          |
| Nuclear receptor subfamily 1, group D, member 1 | <i>Nr1d1</i>    | NM_145434     | Affected  | <b>2.6</b>  | <b>2.2</b> | 1.3         |
| G protein-coupled receptor 56                   | <i>Gpr56</i>    | NM_001198894* | Affected  | <b>2</b>    | -1.3       | <b>-1.8</b> |
| Phospholipase A2, group VII                     | <i>Pla2g7</i>   | NM_013737     | Affected  | <b>1.7</b>  | 1.4        | <b>-2.3</b> |
| Fibroblast growth factor 1                      | <i>Fgf1</i>     | NM_010197     | Affected  | <b>-1.6</b> | ns         | ns          |
| Heparin-binding EGF-like growth factor          | <i>Hbegf</i>    | NM_010415     | Inhibited | ns          | ns         | <b>-1.5</b> |
| Laminin, gamma 2                                | <i>Lamc2</i>    | NM_008485     | Inhibited | ns          | ns         | <b>-1.8</b> |
| Heat shock protein 8                            | <i>Hspa8</i>    | NM031165      | Inhibited | <b>2.3</b>  | ns         | 1.3         |
| Secretoglobin, family 3A, member 1              | <i>Scgb3a1</i>  | NM_054037*    | Inhibited | <b>2.3</b>  | ns         | <b>1.8</b>  |
| NAD(P)H dehydrogenase, quinone 1                | <i>Nqo1</i>     | NM_008706     | Inhibited | 1.4         | 1.4        | <b>1.5</b>  |
| Chloride intracellular channel 5                | <i>Clic5</i>    | NM_172621     | Inhibited | 1.2         | ns         | <b>-1.7</b> |

|                                                  |               |               |           |             |             |             |
|--------------------------------------------------|---------------|---------------|-----------|-------------|-------------|-------------|
| Complement component 5a receptor 1               | <i>C5ar1</i>  | NM_007577*    | Inhibited | -1.2        | ns          | <b>-1.7</b> |
| Small proline-rich protein 1A                    | <i>Sprr1a</i> | NM_009264     | Inhibited | -1.2        | <b>-1.5</b> | <b>-1.5</b> |
| Complement component 4B                          | <i>C4b</i>    | NM_009780     | Inhibited | -1.3        | ns          | <b>-1.9</b> |
| Schlafen 4                                       | <i>Slfn4</i>  | NM_011410     | Inhibited | <b>-1.5</b> | ns          | ns          |
| Chemokine (C-C motif) receptor 5                 | <i>Ccr5</i>   | NM_009917     | Inhibited | <b>-1.6</b> | <b>-1.8</b> | -1.3        |
| Class II transactivator                          | <i>Ciita</i>  | NM_001243760* | Inhibited | <b>-1.6</b> | ns          | ns          |
| Cold inducible RNA binding protein               | <i>Cirbp</i>  | NM_007705     | Inhibited | <b>-1.6</b> | ns          | ns          |
| GTPase, very large interferon inducible 1        | <i>Gvin1</i>  | NM_029000*    | Inhibited | <b>-1.7</b> | 1.3         | -1.4        |
| CD74 antigen                                     | <i>Cd74</i>   | NM_001042605* | Inhibited | <b>-2</b>   | <b>-1.8</b> | 1.4         |
| Histocompatibility 2, class II antigen A, beta 1 | <i>H2-Ab1</i> | NM_207105     | Inhibited | <b>-2.1</b> | <b>-1.6</b> | 1.3         |
| Histocompatibility 2, class II antigen A, alpha  | <i>H2-Aa</i>  | NM_010378     | Inhibited | <b>-2.2</b> | <b>-1.7</b> | 1.4         |
| Histocompatibility 2, class II antigen E, beta   | <i>H2-Eb1</i> | NM_010382     | Inhibited | <b>-2.3</b> | <b>-1.8</b> | 1.4         |
| Hemoglobin, beta adult minor chain               | <i>Hbb-b2</i> | NM_016956     | Inhibited | <b>-2.9</b> | <b>-1.6</b> | -1.2        |

#### Interleukin 1, beta (IL1B)

|                                         |                |               |           |             |             |             |
|-----------------------------------------|----------------|---------------|-----------|-------------|-------------|-------------|
| Heat shock protein 1B                   | <i>Hspa1b</i>  | NM_010478     | Activated | <b>3.2</b>  | <b>1.6</b>  | <b>3.4</b>  |
| Growth differentiation factor 15        | <i>Gdf15</i>   | NM_011819     | Activated | <b>2.2</b>  | <b>1.5</b>  | <b>1.6</b>  |
| Heme oxygenase 1                        | <i>Hmox1</i>   | NM_010442     | Activated | <b>2</b>    | <b>1.6</b>  | <b>2.6</b>  |
| Nicotinamide phosphoribosyltransferase  | <i>Nampt</i>   | NM_021524     | Activated | <b>1.7</b>  | <b>1.5</b>  | <b>1.6</b>  |
| Chemokine (C-X-C motif) ligand 2        | <i>Cxcl2</i>   | NM_009140     | Activated | <b>1.7</b>  | <b>1.7</b>  | <b>2</b>    |
| Chemokine (C-C motif) ligand 3          | <i>Ccl3</i>    | NM_011337     | Activated | <b>1.6</b>  | 1.3         | <b>1.6</b>  |
| Tumor necrosis factor                   | <i>Tnf</i>     | NM_013693*    | Activated | <b>1.6</b>  | 1.4         | <b>1.5</b>  |
| Chemokine (C-X-C motif) ligand 3        | <i>Cxcl3</i>   | NM_203320     | Activated | <b>1.5</b>  | 1.4         | <b>1.8</b>  |
| Chemokine (C-C motif) ligand 9          | <i>Ccl9</i>    | NM_011338     | Activated | <b>1.5</b>  | ns          | ns          |
| Metallothionein 2                       | <i>Mt2</i>     | NM_008630     | Activated | <b>1.5</b>  | 1.3         | <b>2</b>    |
| Metallothionein 1                       | <i>Mt1</i>     | NM_013602     | Activated | 1.4         | 1.3         | <b>1.7</b>  |
| Chemokine (C-X-C motif) ligand 1        | <i>Cxcl1</i>   | NM_008176     | Activated | 1.4         | ns          | <b>1.6</b>  |
| Endothelial PAS domain protein 1        | <i>Epas1</i>   | NM_010137     | Activated | 1.3         | ns          | <b>2.1</b>  |
| Solute carrier family 22, member 4      | <i>Slc22a4</i> | NM_019687     | Activated | 1.3         | 1.3         | <b>1.5</b>  |
| Fatty acid binding protein 5            | <i>Fabp5</i>   | NM_010634*    | Activated | -1.4        | 1.5         | <b>-1.6</b> |
| Chemokine (C-C motif) receptor 5        | <i>Ccr5</i>    | NM_009917     | Activated | <b>-1.6</b> | <b>-1.8</b> | -1.3        |
| Class II transactivator                 | <i>Ciita</i>   | NM_001243760* | Activated | <b>-1.6</b> | ns          | ns          |
| Fatty acid binding protein 1            | <i>Fabp1</i>   | NM_0179399    | Activated | <b>-1.7</b> | ns          | -1.3        |
| Histocompatibility 2, T region locus 23 | <i>H2-T23</i>  | NM_010398     | Activated | ns          | ns          | <b>2.2</b>  |

|                                                   |                  |               |           |             |             |             |
|---------------------------------------------------|------------------|---------------|-----------|-------------|-------------|-------------|
| High mobility group AT-hook 1                     | <i>Hmga1</i>     | NM_016660*    | Activated | ns          | ns          | <b>1.9</b>  |
| Argininosuccinate synthetase 1                    | <i>Ass1</i>      | NM_007494     | Activated | ns          | ns          | <b>1.6</b>  |
| Secreted acidic cysteine rich glycoprotein        | <i>Sparc</i>     | NM_009242*    | Activated | ns          | ns          | <b>-1.9</b> |
| D site albumin promoter binding protein           | <i>Dbp</i>       | NM_016974     | Affected  | <b>3.3</b>  | <b>3.4</b>  | ns          |
| Nuclear receptor subfamily 1, group D, member 1   | <i>Nr1d1</i>     | NM_145434     | Affected  | <b>2.6</b>  | <b>2.2</b>  | 1.3         |
| Immunoresponsive gene 1                           | <i>Irg1</i>      | NM_008392     | Affected  | <b>1.7</b>  | <b>1.6</b>  | 1.4         |
| CD74 antigen                                      | <i>Cd74</i>      | NM_001042605* | Affected  | <b>-2</b>   | <b>-1.8</b> | 1.4         |
| Heparin-binding EGF-like growth factor            | <i>Hbegf</i>     | NM_010415     | Inhibited | ns          | ns          | <b>-1.5</b> |
| Laminin, gamma 2                                  | <i>Lamc2</i>     | NM_008485     | Inhibited | ns          | ns          | <b>-1.8</b> |
| High mobility group AT-hook 1, related sequence 1 | <i>Hmga1-rs1</i> | NM_001166476* | Inhibited | ns          | ns          | <b>-2</b>   |
| NAD(P)H dehydrogenase, quinone 1                  | <i>Nqa1</i>      | NM_008706     | Inhibited | 1.4         | 1.4         | <b>1.5</b>  |
| Actin, alpha2, smooth muscle                      | <i>Acta2</i>     | NM_007392     | Inhibited | 1.4         | ns          | <b>1.5</b>  |
| Surfactant associated protein A1                  | <i>Sftpa1</i>    | NM_023134     | Inhibited | 1.3         | ns          | <b>-1.8</b> |
| Chemokine (C-C motif) receptor 7                  | <i>Ccr7</i>      | NM_007719     | Inhibited | <b>-1.5</b> | <b>-1.7</b> | 1.4         |
| Dual specificity phosphatase 1                    | <i>Dusp1</i>     | NM_013642     | Inhibited | <b>-1.7</b> | ns          | ns          |
| S100 calcium binding protein A6                   | <i>S100a6</i>    | NM_011313     | Inhibited | <b>-1.7</b> | <b>-1.7</b> | -1.2        |
| Nuclear factor, interleukin 3, regulated          | <i>Nfil3</i>     | NM_017373     | Inhibited | <b>-2</b>   | <b>-1.7</b> | -1.3        |

#### Colony stimulating factor 2 (CSF2)

|                                                |               |               |           |             |             |             |
|------------------------------------------------|---------------|---------------|-----------|-------------|-------------|-------------|
| Heat shock 105kDa/110kDa protein 1             | <i>Hsph1</i>  | NM_013559     | Activated | <b>2.7</b>  | 1.3         | <b>1.6</b>  |
| Growth differentiation factor 15               | <i>Gdf15</i>  | NM_011819     | Activated | <b>2.2</b>  | <b>1.5</b>  | <b>1.6</b>  |
| Macrophage receptor with collagenous structure | <i>Marco</i>  | NM_010766     | Activated | <b>2</b>    | <b>1.9</b>  | <b>2.3</b>  |
| Regenerating islet-derived 3 gamma             | <i>Reg3g</i>  | NM_011260     | Activated | <b>1.9</b>  | ns          | <b>1.5</b>  |
| Cd63 antigen                                   | <i>Cd63</i>   | NM_001042580* | Activated | <b>1.7</b>  | 1.3         | 1.3         |
| Chemokine (C-C motif) ligand 3                 | <i>Ccl3</i>   | NM_011337     | Activated | <b>1.6</b>  | 1.3         | <b>1.6</b>  |
| Glutamate-cysteine ligase, modifier subunit    | <i>Gclm</i>   | NM_008129     | Activated | <b>1.6</b>  | <b>1.5</b>  | <b>1.7</b>  |
| Tumor necrosis factor                          | <i>Tnf</i>    | NM_013693*    | Activated | <b>1.6</b>  | 1.4         | <b>1.5</b>  |
| Chemokine (C-X-C motif) ligand 3               | <i>Cxcl3</i>  | NM_203320     | Activated | <b>1.5</b>  | 1.4         | <b>1.8</b>  |
| Chemokine (C-C motif) receptor 5               | <i>Ccr5</i>   | NM_009917     | Activated | <b>-1.6</b> | <b>-1.8</b> | -1.3        |
| Sequestosome 1                                 | <i>Sqstm1</i> | NM_011018*    | Affected  | <b>2</b>    | ns          | <b>1.6</b>  |
| Heat shock protein 1                           | <i>Hspd1</i>  | NM_010477     | Affected  | <b>1.6</b>  | ns          | 1.2         |
| Complement component 5a receptor 1             | <i>C5ar1</i>  | NM_007577*    | Affected  | -1.2        | ns          | <b>-1.7</b> |
| Cardiotrophin-like cytokine factor 1           | <i>Clcf1</i>  | NM_019952     | Affected  | <b>-1.6</b> | ns          | ns          |
| Heparin-binding EGF-like growth factor         | <i>Hbegf</i>  | NM_010415     | Inhibited | ns          | ns          | <b>-1.5</b> |

|                                                  |               |               |           |             |             |             |
|--------------------------------------------------|---------------|---------------|-----------|-------------|-------------|-------------|
| Complement component 4B                          | <i>C4b</i>    | NM_009780     | Inhibited | -1.3        | ns          | <b>-1.9</b> |
| Chemokine (C-C motif) receptor 7                 | <i>Ccr7</i>   | NM_007719     | Inhibited | <b>-1.5</b> | <b>-1.7</b> | 1.4         |
| Class II transactivator                          | <i>Ciita</i>  | NM_001243760* | Inhibited | <b>-1.6</b> | ns          | ns          |
| CD74 antigen                                     | <i>Cd74</i>   | NM_001042605* | Inhibited | <b>-2</b>   | <b>-1.8</b> | 1.4         |
| Histocompatibility 2, class II antigen A, beta 1 | <i>H2-Ab1</i> | NM_207105     | Inhibited | <b>-2.1</b> | <b>-1.6</b> | 1.3         |
| Hemoglobin, beta adult major chain               | <i>Hbb-b1</i> | NM_001278161  | Inhibited | <b>-5.1</b> | <b>-2.7</b> | -1.1        |

#### Complement component 5 (C5)

|                                    |              |               |           |            |            |             |
|------------------------------------|--------------|---------------|-----------|------------|------------|-------------|
| Growth differentiation factor 15   | <i>Gdf15</i> | NM_011819     | Activated | <b>2.2</b> | <b>1.5</b> | <b>1.6</b>  |
| Chemokine (C-X-C motif) ligand 2   | <i>Cxcl2</i> | NM_009140     | Activated | <b>1.7</b> | <b>1.7</b> | <b>2</b>    |
| Cd63 antigen                       | <i>Cd63</i>  | NM_001042580* | Activated | <b>1.7</b> | 1.3        | 1.3         |
| Tumor necrosis factor              | <i>Tnf</i>   | NM_013693*    | Activated | <b>1.6</b> | 1.4        | <b>1.5</b>  |
| Chemokine (C-C motif) ligand 3     | <i>Ccl3</i>  | NM_011337     | Activated | <b>1.6</b> | 1.3        | <b>1.6</b>  |
| Chemokine (C-X-C motif) ligand 3   | <i>Cxcl3</i> | NM_203320     | Activated | <b>1.5</b> | 1.4        | <b>1.8</b>  |
| Chemokine (C-X-C motif) ligand 1   | <i>Cxcl1</i> | NM_008176     | Activated | 1.4        | ns         | <b>1.6</b>  |
| Complement component 5a receptor 1 | <i>C5ar1</i> | NM_007577*    | Activated | -1.2       | ns         | <b>-1.7</b> |

#### Chemokine (C-C motif) ligand 2 (CCL2)

|                                  |              |            |           |            |            |            |
|----------------------------------|--------------|------------|-----------|------------|------------|------------|
| Chemokine (C-X-C motif) ligand 2 | <i>Cxcl2</i> | NM_009140  | Activated | <b>1.7</b> | <b>1.7</b> | <b>2</b>   |
| Tumor necrosis factor            | <i>Tnf</i>   | NM_013693* | Activated | <b>1.6</b> | 1.4        | <b>1.5</b> |
| Chemokine (C-C motif) ligand 3   | <i>Ccl3</i>  | NM_011337  | Activated | <b>1.6</b> | 1.3        | <b>1.6</b> |
| Chemokine (C-C motif) ligand 9   | <i>Ccl9</i>  | NM_011338  | Activated | <b>1.5</b> | ns         | ns         |
| Cathepsin K                      | <i>Ctsk</i>  | NM_007802  | Activated | <b>1.5</b> | ns         | <b>1.9</b> |
| Chemokine (C-X-C motif) ligand 1 | <i>Cxcl1</i> | NM_008176  | Activated | 1.4        | ns         | <b>1.6</b> |

#### **1 - NOTES**

C57 = Smoked C57 mice compared to control C57 mice

RAGE = Smoked RAGE mice compared to control RAGE mice

CS = C57 smoked mice compared to RAGE smoked mice

**Red font = statistically significant (Fold  $\geq$  1.5 and FDR < 0.05)**

ns = not significant (FDR > 0.05)

\* Gene has more than one isoform
